# Supplementary material for: Accurate correction for the matrix interference on laser ablation MC-ICPMS boron isotope measurements in CaCO3 and silicate matrices
Source: Royal Society of Chemistry journal article supplement (doi:10.1039/d1ja00073j), 2021-01-01
Supplement: d1ja00073j1.xlsx [file d1ja00073j1.xlsx]

## Sheet: mass scans
mass	gas blank	calcite ~2 ppm [B]	NIST SRM612	ICP torch glass	CaF
9.9	0.000294	0.000414	0.000359	0.000319	0.000481		all values in V, measured on a 10^3, reported as 10^11 equivalent
9.9	0.000309	0.000449	0.000389	0.000317	0.0005		90 um, 10 Hz, 6 J/cm2, except CaF (20 Hz)
9.901	0.000304	0.000444	0.000365	0.000332	0.000486
9.902	0.000306	0.00042	0.000382	0.000335	0.000491
9.902	0.000308	0.000444	0.000401	0.000333	0.000489
9.903	0.000302	0.000429	0.000411	0.000341	0.000466
9.903	0.000328	0.000443	0.000385	0.00034	0.000492
9.904	0.000322	0.000444	0.000389	0.000336	0.000511
9.904	0.000324	0.000461	0.000393	0.000339	0.000494
9.905	0.00031	0.000436	0.000398	0.000337	0.000491
9.905	0.000327	0.000427	0.000397	0.000294	0.000479
9.906	0.000327	0.000434	0.000408	0.00033	0.000453
9.906	0.000337	0.000443	0.000393	0.000331	0.000458
9.907	0.000338	0.000441	0.000392	0.000323	0.000461
9.907	0.000334	0.000451	0.000392	0.000333	0.000461
9.908	0.000324	0.000428	0.000383	0.00033	0.000466
9.908	0.000306	0.000433	0.000387	0.000326	0.000477
9.909	0.000298	0.000442	0.000394	0.00035	0.000477
9.909	0.000334	0.000441	0.000411	0.000346	0.00046
9.91	0.000338	0.000439	0.000413	0.000353	0.000452
9.91	0.000315	0.000441	0.000389	0.000319	0.000476
9.911	0.000307	0.000462	0.0004	0.000351	0.000499
9.911	0.000314	0.000445	0.0004	0.000333	0.000481
9.912	0.000315	0.000437	0.000408	0.000359	0.000477
9.912	0.000342	0.000447	0.000423	0.000336	0.000485
9.913	0.000332	0.00046	0.000403	0.000313	0.000503
9.913	0.000323	0.000472	0.000395	0.00032	0.000482
9.914	0.000316	0.000458	0.000432	0.000327	0.000501
9.914	0.000337	0.000435	0.000392	0.000347	0.000477
9.915	0.000333	0.000433	0.000404	0.000352	0.000489
9.915	0.000331	0.000448	0.000414	0.000325	0.000496
9.916	0.000338	0.000456	0.000414	0.000329	0.000499
9.916	0.000332	0.000465	0.000414	0.000344	0.000485
9.917	0.000318	0.00046	0.000414	0.000333	0.000494
9.917	0.000335	0.000446	0.000411	0.000338	0.000485
9.918	0.000341	0.000461	0.000402	0.000335	0.000489
9.918	0.000344	0.000479	0.000397	0.000359	0.000495
9.919	0.000339	0.000472	0.000422	0.000355	0.000486
9.919	0.000332	0.000479	0.000421	0.000349	0.000493
9.92	0.000319	0.00046	0.000416	0.000347	0.000499
9.92	0.000348	0.000462	0.000409	0.000334	0.000498
9.921	0.00035	0.000471	0.000417	0.00035	0.000493
9.921	0.000327	0.000474	0.000412	0.000335	0.000503
9.922	0.000334	0.000472	0.00041	0.000335	0.000487
9.922	0.000319	0.000457	0.000408	0.000362	0.00048
9.923	0.000335	0.000476	0.00042	0.000384	0.000485
9.923	0.000333	0.000482	0.000426	0.000346	0.000506
9.924	0.00033	0.000461	0.000415	0.000357	0.000521
9.924	0.000343	0.000461	0.000418	0.000364	0.000521
9.925	0.000341	0.000469	0.000423	0.000339	0.000524
9.925	0.000341	0.000473	0.000419	0.000335	0.000519
9.926	0.000344	0.000475	0.000394	0.000333	0.000513
9.926	0.00034	0.000474	0.000412	0.000359	0.0005
9.927	0.000351	0.000473	0.000424	0.000345	0.000509
9.927	0.000353	0.000497	0.000428	0.000344	0.000499
9.928	0.000322	0.00049	0.000437	0.00034	0.000517
9.928	0.000343	0.000489	0.000421	0.000388	0.000527
9.929	0.00035	0.000502	0.000408	0.00035	0.000494
9.929	0.000334	0.000502	0.000415	0.00037	0.000545
9.93	0.000338	0.000506	0.000431	0.000389	0.00052
9.93	0.000367	0.000493	0.000434	0.000355	0.000536
9.931	0.000355	0.000485	0.000427	0.000354	0.000528
9.931	0.000365	0.000509	0.000438	0.000357	0.000521
9.932	0.000349	0.000492	0.000432	0.000341	0.000534
9.932	0.000348	0.00051	0.000432	0.000352	0.000516
9.933	0.000337	0.000506	0.000426	0.000381	0.000527
9.933	0.000357	0.000541	0.000412	0.000365	0.000542
9.934	0.000365	0.000521	0.000417	0.00036	0.00055
9.934	0.000342	0.000512	0.000434	0.000395	0.000529
9.935	0.000356	0.000527	0.000429	0.000386	0.00054
9.935	0.000353	0.000515	0.000431	0.00038	0.000546
9.936	0.000369	0.000518	0.000449	0.000397	0.000545
9.936	0.000376	0.000543	0.000439	0.000381	0.000566
9.937	0.000371	0.000519	0.000458	0.000369	0.000566
9.937	0.000364	0.000525	0.000475	0.00038	0.000547
9.938	0.000361	0.000542	0.000444	0.000392	0.000541
9.938	0.000374	0.000539	0.000438	0.000397	0.000578
9.939	0.000363	0.000553	0.000442	0.000393	0.000588
9.939	0.000365	0.000537	0.000466	0.000399	0.000584
9.94	0.000385	0.000549	0.000447	0.000396	0.000596
9.94	0.000361	0.000547	0.000478	0.000365	0.000578
9.941	0.000385	0.000561	0.000434	0.0004	0.000556
9.941	0.000372	0.000542	0.000454	0.000383	0.000555
9.942	0.000404	0.000557	0.000486	0.000397	0.000575
9.942	0.000398	0.000561	0.000477	0.000396	0.000583
9.943	0.000395	0.000536	0.000475	0.000393	0.000582
9.943	0.000371	0.000578	0.000455	0.000378	0.000605
9.944	0.000404	0.000546	0.000468	0.000395	0.00059
9.944	0.000389	0.000534	0.00048	0.000402	0.000598
9.945	0.000394	0.000548	0.000477	0.000402	0.000594
9.945	0.000388	0.000562	0.00046	0.0004	0.00058
9.946	0.000404	0.00055	0.000475	0.000402	0.000572
9.946	0.00039	0.00056	0.000458	0.000413	0.000573
9.947	0.000387	0.000579	0.000505	0.000421	0.000577
9.947	0.000421	0.000572	0.000491	0.00043	0.000585
9.948	0.000405	0.000566	0.00048	0.000413	0.000582
9.948	0.000391	0.000565	0.000477	0.000416	0.000584
9.949	0.000397	0.000591	0.000495	0.000407	0.000604
9.949	0.000402	0.000591	0.000484	0.000411	0.00059
9.95	0.000396	0.000565	0.000483	0.000442	0.000569
9.95	0.000417	0.000593	0.000505	0.000438	0.000593
9.951	0.000421	0.000582	0.000478	0.000409	0.000596
9.951	0.000403	0.000594	0.000494	0.000417	0.000593
9.952	0.000411	0.000585	0.000499	0.000424	0.000633
9.952	0.000407	0.000599	0.000503	0.000415	0.000611
9.953	0.00039	0.000611	0.000501	0.000414	0.000604
9.953	0.000415	0.000617	0.000487	0.000426	0.000619
9.954	0.000401	0.000601	0.000518	0.000441	0.000626
9.954	0.000419	0.000611	0.000496	0.000433	0.000613
9.955	0.000403	0.000611	0.000485	0.00043	0.000634
9.955	0.000421	0.000613	0.000504	0.000427	0.000651
9.956	0.000392	0.000622	0.000484	0.000413	0.000621
9.956	0.000409	0.00064	0.000484	0.000424	0.000651
9.957	0.00041	0.000627	0.000496	0.000413	0.000631
9.957	0.000408	0.000607	0.000503	0.000436	0.000625
9.958	0.000421	0.00061	0.000505	0.00042	0.000619
9.958	0.000406	0.000621	0.000505	0.000435	0.000647
9.959	0.00042	0.000635	0.000486	0.000428	0.000637
9.959	0.000395	0.000638	0.000477	0.000426	0.000634
9.96	0.000398	0.000614	0.000494	0.00041	0.000646
9.96	0.000425	0.000617	0.000482	0.00042	0.000651
9.961	0.000405	0.000641	0.000474	0.000409	0.000654
9.961	0.000413	0.000634	0.000479	0.000415	0.000636
9.962	0.000404	0.000606	0.000505	0.000415	0.000637
9.962	0.000381	0.000612	0.000501	0.000408	0.000647
9.963	0.000379	0.000618	0.000477	0.000404	0.000628
9.963	0.000361	0.000633	0.000469	0.000416	0.00061
9.964	0.000378	0.000607	0.000481	0.000413	0.000648
9.964	0.000377	0.000611	0.000486	0.000409	0.000619
9.965	0.000379	0.000615	0.000463	0.000387	0.000649
9.965	0.000404	0.000616	0.000493	0.000398	0.000636
9.966	0.00038	0.000618	0.000486	0.000395	0.000636
9.966	0.000396	0.00061	0.000494	0.000392	0.000643
9.967	0.000394	0.000629	0.00048	0.000379	0.00065
9.967	0.000373	0.00059	0.000438	0.000395	0.000655
9.968	0.000373	0.00061	0.00048	0.000403	0.00064
9.968	0.000371	0.000618	0.000489	0.000374	0.000642
9.969	0.000382	0.000632	0.000489	0.000385	0.000642
9.969	0.000366	0.00061	0.000472	0.000381	0.000619
9.97	0.000369	0.000616	0.000481	0.000382	0.000666
9.97	0.000366	0.000635	0.000471	0.000397	0.00065
9.971	0.000373	0.000617	0.000465	0.000388	0.000645
9.971	0.000379	0.000632	0.000443	0.000388	0.000639
9.972	0.000367	0.000634	0.000457	0.000394	0.000616
9.972	0.000373	0.000617	0.000459	0.000371	0.000629
9.973	0.000363	0.000639	0.000464	0.000382	0.000635
9.973	0.000365	0.000641	0.000459	0.000368	0.000661
9.974	0.000365	0.000638	0.00048	0.000367	0.000658
9.974	0.000341	0.000636	0.000457	0.000366	0.000666
9.975	0.00038	0.000631	0.000468	0.000359	0.000691
9.975	0.000352	0.000654	0.000439	0.000377	0.000658
9.976	0.000352	0.000634	0.00045	0.00037	0.000656
9.976	0.00036	0.000655	0.000456	0.000357	0.00067
9.977	0.000359	0.000657	0.000464	0.000352	0.000668
9.977	0.000371	0.000652	0.000453	0.000363	0.000679
9.978	0.000366	0.000634	0.000454	0.000378	0.000655
9.978	0.000347	0.000662	0.000476	0.000368	0.000705
9.979	0.000361	0.00075	0.000527	0.000351	0.000809
9.979	0.00044	0.00106	0.000689	0.000479	0.00111
9.98	0.000716	0.00185	0.00119	0.000732	0.00182
9.98	0.00139	0.00346	0.00235	0.00148	0.00316
9.981	0.00267	0.00614	0.00448	0.00288	0.00531
9.981	0.00489	0.0102	0.00797	0.00523	0.00867
9.982	0.00796	0.0157	0.0128	0.00861	0.0133
9.982	0.012	0.022	0.0187	0.0131	0.0189
9.983	0.0168	0.0287	0.0253	0.0184	0.0249
9.983	0.0227	0.0359	0.0327	0.0247	0.0315
9.984	0.0293	0.0432	0.0404	0.0317	0.0382
9.984	0.0357	0.0505	0.048	0.0388	0.0449
9.985	0.0425	0.0575	0.0554	0.0461	0.0511
9.985	0.0471	0.0621	0.0603	0.0511	0.0552
9.986	0.0511	0.0665	0.0648	0.0556	0.0593
9.986	0.0563	0.0722	0.071	0.0614	0.0645
9.987	0.0612	0.0782	0.0773	0.0672	0.0696
9.987	0.0656	0.0843	0.0829	0.0723	0.0752
9.988	0.0698	0.0901	0.0883	0.0771	0.0804
9.988	0.073	0.0953	0.0933	0.0813	0.0854
9.989	0.0754	0.1	0.097	0.0845	0.0897
9.989	0.077	0.104	0.0997	0.0865	0.0929
9.99	0.0779	0.107	0.102	0.0878	0.095
9.99	0.0784	0.109	0.103	0.0885	0.0964
9.991	0.0788	0.11	0.104	0.0891	0.0971
9.991	0.0789	0.11	0.104	0.0893	0.0972
9.992	0.0791	0.11	0.104	0.0894	0.0974
9.992	0.079	0.111	0.104	0.0896	0.0976
9.993	0.079	0.111	0.104	0.0894	0.0976
9.993	0.0792	0.111	0.104	0.0895	0.0976
9.994	0.0793	0.111	0.104	0.0896	0.0978
9.994	0.0793	0.111	0.104	0.0897	0.098
9.995	0.0792	0.11	0.104	0.0897	0.0975
9.995	0.0789	0.109	0.104	0.0893	0.0969
9.996	0.078	0.107	0.102	0.0885	0.0954
9.996	0.0765	0.104	0.1	0.0869	0.0928
9.997	0.0742	0.1	0.0963	0.0842	0.089
9.997	0.0708	0.0949	0.0915	0.0804	0.0842
9.998	0.0662	0.0884	0.0853	0.0751	0.0783
9.998	0.0606	0.0813	0.0783	0.0692	0.0718
9.999	0.0544	0.0741	0.071	0.0625	0.0653
9.999	0.0481	0.067	0.0634	0.0555	0.059
10	0.0412	0.0596	0.0556	0.0482	0.0526
10	0.0336	0.0513	0.0469	0.0397	0.0454
10.001	0.0297	0.047	0.0424	0.0353	0.0416
10.001	0.026	0.0429	0.0381	0.0313	0.0382
10.002	0.0211	0.0372	0.0323	0.0258	0.0333
10.002	0.0162	0.0311	0.0264	0.0201	0.0279
10.003	0.0116	0.0251	0.0208	0.0148	0.0226
10.003	0.0079	0.0193	0.0162	0.0104	0.0174
10.004	0.00508	0.0141	0.0127	0.00683	0.0129
10.004	0.00306	0.00973	0.0103	0.00425	0.00894
10.005	0.00183	0.00639	0.00912	0.00251	0.00575
10.005	0.00117	0.00404	0.0093	0.00151	0.00359
10.006	0.000862	0.0025	0.0105	0.00102	0.00231
10.006	0.000749	0.00169	0.0124	0.000783	0.00163
10.007	0.00076	0.00132	0.0146	0.000717	0.00131
10.007	0.000785	0.00118	0.0171	0.000724	0.0012
10.008	0.000825	0.00116	0.0195	0.000751	0.00119
10.008	0.000884	0.00118	0.0219	0.000794	0.00128
10.009	0.000956	0.00124	0.0242	0.000813	0.0013
10.009	0.000943	0.00127	0.0262	0.000862	0.00136
10.01	0.00101	0.00131	0.0279	0.000898	0.00139
10.01	0.00104	0.00135	0.0294	0.000896	0.00144
10.011	0.00106	0.0014	0.0306	0.000944	0.00147
10.011	0.00109	0.00144	0.0315	0.000937	0.00156
10.012	0.00107	0.00145	0.032	0.000977	0.00159
10.012	0.00109	0.00146	0.0323	0.000961	0.00159
10.013	0.00109	0.00149	0.0327	0.000967	0.00156
10.013	0.00109	0.00148	0.0328	0.00096	0.00156
10.014	0.00106	0.00149	0.0328	0.000979	0.00153
10.014	0.0011	0.00148	0.0329	0.00099	0.00152
10.015	0.0011	0.00148	0.0329	0.000965	0.00151
10.015	0.00107	0.0015	0.033	0.000986	0.00153
10.016	0.0011	0.00148	0.0329	0.000964	0.00152
10.016	0.00109	0.00149	0.0328	0.000969	0.00153
10.017	0.00109	0.00148	0.0328	0.000967	0.00155
10.017	0.00109	0.00149	0.0325	0.000953	0.00156
10.018	0.00109	0.00145	0.0325	0.000959	0.00156
10.018	0.00106	0.00143	0.032	0.000949	0.00151
10.019	0.00107	0.00142	0.0315	0.000942	0.00152
10.019	0.00104	0.00137	0.0303	0.000929	0.00148
10.02	0.001	0.00133	0.0289	0.000897	0.00145
10.02	0.00101	0.00128	0.0272	0.000865	0.00139
10.021	0.000926	0.00121	0.0253	0.000832	0.00141
10.021	0.000888	0.00114	0.0231	0.000795	0.00131
10.022	0.000795	0.00108	0.0208	0.000721	0.00121
10.022	0.000749	0.00102	0.0182	0.000673	0.00114
10.023	0.000647	0.000945	0.0155	0.000611	0.00105
10.023	0.000605	0.000856	0.0129	0.000554	0.000951
10.024	0.000548	0.000814	0.0105	0.000527	0.000875
10.024	0.000495	0.000752	0.00844	0.000476	0.00081
10.025	0.000429	0.000697	0.00653	0.000431	NaN
10.025	0.000412	0.000657	0.00479	0.000397	NaN
10.026	0.000384	0.000606	0.00343	0.000386	NaN
10.026	0.00037	0.000567	0.00239	0.000354	0.000762
10.027	0.000356	0.000543	0.00159	0.000354	0.00063
10.027	0.000336	0.000514	0.00104	0.000334	0.000604
10.028	0.000333	0.000498	0.000731	0.000339	0.000562
10.028	0.000356	0.00049	0.000565	0.000341	0.000556
10.029	0.000326	0.000474	0.000495	0.000332	0.000543
10.029	0.000334	0.000481	0.000434	0.000317	0.000524
10.03	0.000336	0.000475	0.000408	0.000337	0.00051
10.03	0.000339	0.000474	0.000396	0.000348	0.00051
10.031	0.000336	0.000471	0.000397	0.000342	0.000517
10.031	0.00032	0.000484	0.0004	0.000344	0.000523
10.032	0.00035	0.000476	0.000399	0.000319	0.000505
10.032	0.000349	0.00048	0.000428	0.000325	0.000521
10.033	0.000337	0.0005	0.0004	0.00035	0.000536
10.033	0.000335	0.00049	0.000419	0.000319	0.000525
10.034	0.000329	0.000479	0.000387	0.000312	0.000526
10.034	0.000327	0.000439	0.000394	0.000327	0.000517
10.035	0.000334	0.000453	0.000394	0.00033	0.000501
10.035	0.000322	0.000485	0.00039	0.000321	0.000495
10.036	0.000308	0.000486	0.000399	0.000323	0.000527
10.036	0.000329	0.00046	0.000387	0.000312	0.000508
10.037	0.000322	0.000476	0.00042	0.000319	0.000511
10.037	0.000342	0.000467	0.000392	0.000316	0.000501
10.038	0.000324	0.000457	0.000395	0.000344	0.000496
10.038	0.000316	0.000449	0.000375	0.000331	0.000487
10.039	0.000333	0.00047	0.000387	0.000329	0.000503
10.039	0.00032	0.000468	0.000406	0.000332	0.000474
10.04	0.000337	0.000459	0.000377	0.000322	0.000469
10.04	0.000321	0.000446	0.000382	0.000324	0.000452
10.041	0.000328	0.00048	0.0004	0.000328	0.000464
10.041	0.000327	0.000451	0.000383	0.000325	0.000488
10.042	0.000322	0.000457	0.00039	0.000318	0.000488
10.042	0.000322	0.000441	0.000393	0.000319	0.000488
10.043	0.000328	0.000441	0.000382	0.000328	0.000457
10.043	0.000308	0.000433	0.000386	0.000327	0.000463
10.044	0.000324	0.000449	0.000378	0.000319	0.000466
10.044	0.000326	0.000443	0.000375	0.000332	0.000485
10.045	0.000308	0.000452	0.000394	0.000303	0.000465
10.045	0.000331	0.000478	0.000385	0.000314	0.000481
10.046	0.000305	0.000459	0.000389	0.000312	0.000485
10.046	0.000304	0.000455	0.000417	0.000318	0.000471
10.047	0.000316	0.000456	0.000397	0.000293	0.00045
10.047	0.000322	0.000452	0.000402	0.000345	0.00045
10.048	0.000325	0.000447	0.000386	0.000318	0.000463
10.048	0.00033	0.00043	0.000384	0.000331	0.000479
10.049	0.000312	0.000432	0.000395	0.000341	0.000438
10.049	0.000303	0.000436	0.000376	0.000342	0.000482
10.05	0.000306	0.000443	0.000409	0.000319	0.000468
10.05	0.00032	0.000437	0.000376	0.000292	0.000453
10.051	0.000301	0.000412	0.000383	0.000311	0.00045
10.051	0.000332	0.000437	0.000379	0.000301	0.000471
10.052	0.000307	0.000437	0.000392	0.000304	0.000456
10.052	0.000308	0.000421	0.000391	0.000323	0.000464
10.053	0.00031	0.000441	0.000387	0.000311	0.000467
10.053	0.000339	0.000425	0.00039	0.000308	0.000462
10.054	0.000327	0.000422	0.000371	0.000318	0.000444
10.054	0.00031	0.000406	0.000381	0.0003	0.000462
10.055	0.000321	0.000412	0.000386	0.000309	0.000464
10.055	0.000307	0.000397	0.000382	0.000325	0.000449
10.056	0.00031	0.000408	0.000387	0.00029	0.000438
10.056	0.00031	0.0004	0.00039	0.000312	0.000438
10.057	0.000337	0.000427	0.000368	0.00031	0.000446
10.057	0.000289	0.000424	0.00035	0.000312	0.00044
10.058	0.000306	0.000409	0.000363	0.000307	0.000445
10.058	0.000329	0.000431	0.000394	0.000292	0.000428
10.059	0.000323	0.000408	0.000375	0.000324	0.000406
10.059	0.000323	0.000403	0.00037	0.00032	0.000418
10.06	0.000306	0.000403	0.000385	0.000293	0.000421
10.06	0.000307	0.000405	0.000381	0.000295	0.000415
10.061	0.000299	0.000431	0.000372	0.000317	0.000428
10.061	0.00031	0.00042	0.000375	0.000307	0.000411
10.062	0.000288	0.000385	0.000362	0.000305	0.000423
10.062	0.000312	0.000411	0.000375	0.000292	0.000425
10.063	0.000303	0.000397	0.000381	0.000309	0.000391
10.063	0.00029	0.000411	0.000374	0.000277	0.000408
10.064	0.00031	0.000395	0.000353	0.000292	0.000449
10.064	0.0003	0.000391	0.000356	0.00031	0.000431
10.065	0.000313	0.000391	0.000374	0.000313	0.00042
10.065	0.000306	0.000418	0.000347	0.000299	0.000422
10.066	0.000298	0.000396	0.000385	0.000291	0.000427
10.066	0.000271	0.000404	0.000383	0.000289	0.000445
10.067	0.000308	0.000377	0.000374	0.000291	0.000446
10.067	0.000313	0.000398	0.000359	0.00031	0.000432
10.068	0.000302	0.000383	0.000361	0.000296	0.000416
10.068	0.000302	0.000397	0.000362	0.000314	0.000409
10.069	0.000303	0.000431	0.00037	0.000301	0.000438
10.069	0.000311	0.000415	0.000381	0.000273	0.000416
10.07	0.000317	0.000408	0.000379	0.000297	0.000395
10.07	0.000295	0.000409	0.000359	0.000313	0.000403
10.071	0.000307	0.000399	0.000338	0.000314	0.000379
10.071	0.000304	0.00041	0.000352	0.000306	0.000411
10.072	0.000292	0.000392	0.000377	0.000304	0.000409
10.072	0.000303	0.000429	0.000376	0.000308	0.000413
10.073	0.000322	0.000428	0.00037	0.000317	0.000411
10.073	0.000304	0.0004	0.000367	0.000271	0.00041
10.074	0.00033	0.000402	0.000355	0.000293	0.000401
10.074	0.000304	0.000407	0.000358	0.000286	0.000413
10.075	0.000299	0.000404	0.000358	0.000289	0.000415
10.075	0.000299	0.000419	0.000348	0.000298	0.000404
10.076	0.000283	0.000399	0.000363	0.000301	0.000399
10.076	0.000311	0.000395	0.000354	0.000312	0.000396
10.077	0.00029	0.000411	0.000367	0.000305	0.000412
10.077	0.00028	0.000376	0.000325	0.000284	0.000421
10.078	0.000317	0.000418	0.000361	0.000291	0.000418
10.078	0.00029	0.000395	0.000357	0.000295	0.000406
10.079	0.000307	0.000417	0.000367	0.000288	0.000399
10.079	0.000324	0.000403	0.000353	0.000291	0.0004
10.08	0.000311	0.00041	0.000359	0.000304	0.000412
10.08	0.000289	0.000407	0.00036	0.000296	0.00041
10.081	0.000293	0.00041	0.00033	0.000301	0.000406
10.081	0.000295	0.0004	0.000348	0.000282	0.000401
10.082	0.000302	0.000401	0.000345	0.000298	0.000414
10.082	0.000292	0.000409	0.00034	0.000301	0.000402
10.083	0.000298	0.0004	0.00035	0.000287	0.000429
10.083	0.000299	0.000382	0.000351	0.000279	0.000425
10.084	0.000308	0.000375	0.000367	0.000302	0.000414
10.084	0.000299	0.000418	0.000337	0.000302	0.000411
10.085	0.000301	0.000393	0.00036	0.000299	0.000382
10.085	0.000306	0.000393	0.000331	0.000307	0.000399
10.086	0.000298	0.000409	0.000356	0.000297	0.00039
10.086	0.000302	0.000384	0.00034	0.000296	0.000393
10.087	0.000302	0.000391	0.000351	0.000282	0.00039
10.087	0.000286	0.000388	0.000353	0.000291	0.000387
10.088	0.000291	0.000369	0.000361	0.000284	0.000382
10.088	0.000301	0.000392	0.000366	0.000301	0.000386
10.089	0.000279	0.000388	0.000348	0.000303	0.00037
10.089	0.00029	0.000367	0.000349	0.000278	0.000391
10.09	0.000294	0.000395	0.000334	0.000278	0.000385
10.09	0.000312	0.000394	0.00035	0.000287	0.000391
10.091	0.000291	0.000409	0.000361	0.000298	0.000402
10.091	0.000295	0.000379	0.000328	0.000289	0.000388
10.092	0.000297	0.000397	0.000354	0.000293	0.000391
10.092	0.000299	0.000386	0.000358	0.000308	0.000382
10.093	0.000284	0.000381	0.000356	0.0003	0.000388
10.093	0.000301	0.000391	0.000347	0.000302	0.000381
10.094	0.000311	0.000393	0.000371	0.000299	0.000383
10.094	0.000296	0.00038	0.000351	0.000288	0.000398
10.095	0.000289	0.00039	0.000337	0.000297	0.000365
10.095	0.00028	0.000373	0.000355	0.000287	0.000377
10.096	0.000298	0.000377	0.000366	0.000294	0.00036
10.096	0.000289	0.000375	0.000331	0.000266	0.000391
10.097	0.000285	0.000386	0.000369	0.000312	0.000383
10.097	0.000292	0.000394	0.000345	0.000285	0.00039
10.098	0.000287	0.00038	0.000343	0.000276	0.000385
10.098	0.000295	0.000347	0.000361	0.000285	0.000379
10.099	0.000298	0.000372	0.000347	0.000293	0.000385
10.099	0.000278	0.000406	0.000355	0.000294	0.000377
10.1	0.00029	0.00037	0.00035	0.000264	0.000374
10.1	0.00029	0.000364	0.000344	0.00031	0.000381
10.101	0.0003	0.00039	0.000336	0.00031	0.000393
10.101	0.000291	0.000363	0.000336	0.000292	0.000398
10.102	0.000308	0.000365	0.000345	0.000293	0.00038
10.102	0.000292	0.000366	0.000335	0.000289	0.000383
10.103	0.000304	0.000384	0.000338	0.000273	0.000393
10.103	0.000283	0.000377	0.000333	0.000304	0.000386
10.104	0.000298	0.000372	0.000338	0.000264	0.000386
10.104	0.000311	0.000375	0.00037	0.000282	0.000389
10.105	0.000299	0.000373	0.000361	0.000293	0.000386
10.105	0.000267	0.000342	0.000346	0.000303	0.000371
10.106	0.000282	0.000376	0.000331	0.000294	0.000371
10.106	0.000292	0.000399	0.000364	0.000302	0.000375
10.107	0.000278	0.000372	0.000352	0.000283	0.000379
10.107	0.000288	0.000357	0.000337	0.000271	0.00036
10.108	0.000279	0.000358	0.000353	0.000278	0.000368
10.108	0.000277	0.000367	0.000335	0.00028	0.000383
10.109	0.000273	0.000369	0.00036	0.000269	0.000383
10.109	0.000293	0.000371	0.000358	0.000302	0.000386
10.11	0.000301	0.000381	0.000354	0.00029	0.000381
10.11	0.000302	0.000349	0.000352	0.000272	0.000395
10.111	0.000311	0.000376	0.000349	0.000285	0.000371
10.111	0.000304	0.000375	0.000342	0.00026	0.000392
10.112	0.000303	0.000353	0.000337	0.000287	0.000366
10.112	0.000308	0.000361	0.000333	0.000285	0.000366
10.113	0.000268	0.000352	0.000354	0.000277	0.000377
10.113	0.000269	0.000374	0.000349	0.000273	0.000364
10.114	0.00029	0.000349	0.000354	0.00029	0.000375
10.114	0.000282	0.000361	0.000325	0.000296	0.000399
10.115	0.000312	0.00039	0.000328	0.000282	0.00038
10.115	0.000274	0.000379	0.000332	0.000283	0.000364
10.116	0.000309	0.000353	0.000345	0.000295	0.000378
10.116	0.000291	0.000346	0.000316	0.000283	0.000366
10.117	0.000289	0.000358	0.00035	0.000276	0.00037
10.117	0.0003	0.000388	0.000347	0.00028	0.000374
10.118	0.000306	0.000379	0.000326	0.000254	0.000373
10.118	0.000272	0.000372	0.000329	0.000278	0.00037
10.119	0.000281	0.000375	0.00034	0.000278	0.000348
10.119	0.00028	0.000363	0.000334	0.00029	0.000346
10.12	0.000288	0.000367	0.000349	0.000288	0.000367
10.12	0.000275	0.000365	0.000355	0.000295	0.000375
10.121	0.000277	0.000365	0.000336	0.000279	0.000372
10.121	0.000274	0.000347	0.000338	0.000293	0.000377
10.122	0.000288	0.000349	0.000314	0.000276	0.000347
10.122	0.000292	0.000373	0.000335	0.000291	0.000363
10.123	0.000276	0.000346	0.000324	0.000253	0.000341
10.123	0.000261	0.000349	0.000323	0.000282	0.000364
10.124	0.000278	0.000366	0.000319	0.000283	0.000374
10.124	0.000279	0.000354	0.000334	0.000287	0.000362
10.125	0.000293	0.000361	0.000325	0.000268	0.000374
10.125	0.000283	0.00038	0.000329	0.000277	0.00036
10.126	0.000285	0.000355	0.000324	0.000266	0.000349
10.126	0.000282	0.000363	0.000347	0.000282	0.000369
10.127	0.000289	0.000343	0.000327	0.000289	0.000346
10.127	0.000296	0.000348	0.000323	0.000284	0.000357
10.128	0.000277	0.00036	0.000343	0.000262	0.000364
10.128	0.000267	0.000369	0.000349	0.000278	0.000332
10.129	0.000279	0.000357	0.00035	0.000306	0.000365
10.129	0.000287	0.000362	0.000366	0.000273	0.000373
10.13	0.000266	0.000347	0.000326	0.000278	0.000351
10.13	0.000264	0.000358	0.000315	0.000287	0.00036
10.131	0.000288	0.000349	0.000331	0.000265	0.00033
10.131	0.000299	0.000355	0.00034	0.000264	0.000368
10.132	0.000267	0.000361	0.000322	0.000271	0.000375
10.132	0.000298	0.000338	0.000323	0.00026	0.000365
10.133	0.000269	0.000355	0.000333	0.000254	0.000364
10.133	0.000285	0.000344	0.000343	0.00027	0.00035
10.134	0.000295	0.000348	0.000326	0.000279	0.000371
10.134	0.000289	0.000345	0.000347	0.000256	0.000356
10.135	0.000279	0.000356	0.000332	0.000279	0.000363
10.135	0.000272	0.000342	0.000354	0.000269	0.00036
10.136	0.000281	0.00034	0.000346	0.000271	0.000351
10.136	0.000279	0.000352	0.000344	0.000285	0.000346
10.137	0.000266	0.000354	0.00032	0.00029	0.000355
10.137	0.000273	0.000343	0.000292	0.000251	0.000339
10.138	0.000287	0.000345	0.000352	0.000276	0.000338
10.138	0.000276	0.000358	0.00032	0.000274	0.000393
10.139	0.000275	0.000352	0.000333	0.000265	0.000329
10.139	0.000283	0.000362	0.000333	0.000274	0.000332
10.14	0.000289	0.000362	0.000338	0.000275	0.000356
10.14	0.000292	0.000346	0.000353	0.000272	0.00035
10.141	0.000297	0.000361	0.000321	0.000292	0.000357
10.141	0.000266	0.000349	0.000323	0.000268	0.000349
10.142	0.000283	0.000354	0.000308	0.000267	0.000344
10.142	0.00027	0.000332	0.000339	0.000264	0.000349
10.143	0.000277	0.000335	0.000306	0.00025	0.000349
10.143	0.000289	0.00035	0.000329	0.000292	0.000348
10.144	0.000293	0.000358	0.000312	0.000281	0.000355
10.144	0.000289	0.000363	0.000326	0.000266	0.000348
10.145	0.000278	0.000374	0.000324	0.000257	0.000354
10.145	0.000279	0.000372	0.000319	0.000247	0.000351
10.146	0.00028	0.000343	0.000328	0.000276	0.000347
10.146	0.00028	0.000357	0.000303	0.00028	0.00034
10.147	0.000285	0.000347	0.00033	0.000291	0.000344
10.147	0.000271	0.000359	0.000345	0.000265	0.000349
10.148	0.00028	0.000344	0.00033	0.000261	0.000324
10.148	0.000253	0.00033	0.000328	0.000268	0.000343
10.149	0.000268	0.000342	0.000343	0.000257	0.000355
10.149	0.000264	0.000345	0.000324	0.000269	0.000345
10.15	0.000271	0.000328	0.000334	0.000262	0.000341

## Sheet: UWC-3
				raw ratios			raw voltages				signal/background ratios		ratio 2SE		ratio 2RSE			NIST SRM612 standardised			B/Ca corrected
session	beam diameter (um)	repetition rate (Hz)		11/10	11/10.089	11/10.5	11B signal	11B gas blank	10B signal	10B gas blank	11B	10B	11/10	11/10.089	11/10 (permil)	11/10.089 (%)		11/10	d11B (NIST951)		d11B (NIST951)
1	90	6	2019-11-25	4.62788	756.436	2896.39	0.0922067	0.00803087	0.0201451	0.00195654	11.4815	10.2963	0.00143991	16.9972	0.311138	22.4702		4.08572	10.3992		21.9036
1	90	6	2019-11-25	4.62737	830.382	3033.31	0.0704398	0.00620593	0.0154565	0.00157518	11.3504	9.81255	0.00141867	27.3402	0.306582	32.9248		4.08806	10.9778		21.5168
1	90	6	2019-11-25	4.6259	860.614	2773	0.0977031	0.00637907	0.0213489	0.0016072	15.3162	13.2833	0.00133048	15.207	0.287614	17.6699		4.088	10.9628		21.1898
1	90	6	2019-11-25	4.62101	825.324	2740.2	0.0833785	0.00526175	0.0182734	0.00136893	15.8461	13.3487	0.00141534	22.7105	0.306284	27.5171		4.08575	10.4075		21.0028
1	75	6	2019-11-25	4.61836	776.763	2566.09	0.0535679	0.00419854	0.0118263	0.00113619	12.7587	10.4088	0.00198476	24.9889	0.429756	32.1705		4.08354	9.86108		19.3437
1	75	6	2019-11-25	4.61698	745.067	3447.36	0.0538497	0.00373389	0.0118972	0.00104236	14.4219	11.4138	0.00200847	30.7901	0.435018	41.3253		4.0836	9.87407		19.4984
1	75	6	2019-11-25	4.62043	685.058	2936.27	0.0491129	0.00334345	0.0108597	0.000953799	14.6893	11.3857	0.00195097	24.3407	0.422248	35.5309		4.08559	10.3664		20.2927
1	75	6	2019-11-25	4.6187	715.808	2928.91	0.0508179	0.0033305	0.0112461	0.000964631	15.2583	11.6584	0.00150796	25.7624	0.326489	35.9906		4.08519	10.2679		20.0335
1	75	6	2019-11-25	4.62065	764.809	3015.41	0.0528231	0.0032557	0.0116756	0.000948168	16.2248	12.3138	0.00192291	27.0569	0.416156	35.3773		4.08691	10.6943		20.2291
1	75	6	2019-11-25	4.61747	709.6	4180.1	0.0526962	0.0030859	0.0116584	0.000914159	17.0765	12.7531	0.00177519	21.1868	0.384451	29.8573		4.08629	10.5394		20.3364
1	75	6	2019-11-25	4.61094	547.295	2102.3	0.0409742	0.00289955	0.00912633	0.00086931	14.1312	10.4984	0.00212734	13.8397	0.461368	25.2875		4.08151	9.35769		20.2113
1	75	6	2019-11-25	4.6112	670.552	2119.89	0.0489131	0.0026847	0.0108532	0.000827621	18.2192	13.1138	0.00270029	22.8878	0.585592	34.1328		4.08313	9.75799		19.765
1	90	6	2019-11-26	4.66157	656.877	2551.39	0.0415537	0.00229531	0.00902132	0.00059961	18.1037	15.0453	0.00207507	24.0877	0.445144	36.67		4.09203	11.9605		21.4119
1	90	6	2019-11-26	4.65439	689.197	1769.8	0.0473768	0.00189795	0.0102898	0.00051846	24.9621	19.8467	0.00160017	26.025	0.343798	37.7614		4.09215	11.9881		21.1609
1	90	6	2019-11-26	4.65674	739.331	2184.96	0.0472782	0.00180716	0.0102628	0.000498366	26.1616	20.593	0.00203188	27.9426	0.436331	37.7945		4.09772	13.3675		22.1456
1	90	6	2019-11-26	4.65002	631.757	1799.03	0.0387161	0.00118821	0.00844022	0.00036962	32.5836	22.8348	0.00262651	25.7232	0.564837	40.7169		4.09399	12.4436		22.1264
2	90	6	2020-03-19	4.58896	449.731	-1778.08	0.0315971	0.00194314	0.00710194	0.000639678	16.2608	11.1024	0.00255458	15.3788	0.55668	34.1955		4.08195	9.4669		21.494
2	90	6	2020-03-19	4.59509	581.043	609.71	0.0441469	0.00178579	0.00982248	0.000603444	24.7212	16.2774	0.00201964	13.6788	0.439521	23.5418		4.08659	10.6143		20.5891
2	90	6	2020-03-19	4.60012	601.334	1374.19	0.0435327	0.00158193	0.00967953	0.00056006	27.5187	17.283	0.00174657	15.4141	0.37968	25.6332		4.09062	11.6106		21.3362
2	90	6	2020-03-19	4.5962	644.54	666.215	0.0413975	0.00151733	0.00921957	0.000542906	27.2831	16.9819	0.00231036	28.214	0.502668	43.7739		4.08701	10.7168		19.9561
2	90	6	2020-03-19	4.59584	616.786	-3094.76	0.0431354	0.00138075	0.00959413	0.00050867	31.2406	18.8612	0.00215268	23.6787	0.468399	38.3905		4.08714	10.7514		20.2966
2	90	6	2020-03-19	4.59596	587.871	-589.706	0.0406315	0.00126407	0.00904762	0.000481709	32.1435	18.7823	0.0022634	14.8725	0.492476	25.2989		4.08742	10.82		20.7094
2	90	6	2020-03-19	4.59652	581.543	1725.23	0.0392509	0.00121324	0.00874238	0.000466906	32.3522	18.7241	0.00280468	24.1225	0.610174	41.4802		4.08767	10.8809		20.8494
2	90	6	2020-03-19	4.59767	636.742	-10151.3	0.0416985	0.00114799	0.00927108	0.000451034	36.3231	20.5552	0.00224891	24.9957	0.489141	39.2556		4.0892	11.2589		20.5818
2	90	6	2020-03-19	4.59551	595.064	17970.9	0.0395913	0.001098	0.00881393	0.000437662	36.0577	20.1387	0.0024416	22.9382	0.5313	38.5474		4.08758	10.8592		20.6603
2	90	6	2020-03-19	4.59368	494.314	4352.26	0.0323834	0.0010477	0.00724832	0.000426881	30.9092	16.9797	0.00192329	21.2717	0.418683	43.0327		4.08558	10.3637		21.5921
2	90	6	2020-03-20	4.60565	648.999	872.098	0.0316074	0.00134598	0.00703419	0.000463262	23.4829	15.184	0.00262672	38.1404	0.570326	58.7681		4.08444	10.0814		20.32
2	90	6	2020-03-20	4.60618	487.201	-857.265	0.027913	0.00107288	0.00623219	0.000405158	26.0169	15.3821	0.00283857	17.8158	0.616253	36.5677		4.08282	9.68174		22.5448
2	90	6	2020-03-20	4.61365	580.749	478.262	0.0316056	0.000965897	0.00702261	0.000381272	32.7215	18.4189	0.00265459	26.9697	0.575377	46.4394		4.08994	11.4418		22.6295
2	90	6	2020-03-20	4.60851	540.774	22.7123	0.0273149	0.000915272	0.0060966	0.00036807	29.8435	16.5637	0.00264108	30.6701	0.573087	56.7152		4.08515	10.2582		22.0991
2	90	6	2020-03-20	4.60069	504.601	666.661	0.0293448	0.00089495	0.00654893	0.000364998	32.7893	17.9424	0.00269733	22.1745	0.58629	43.9447		4.07824	8.55003		21.0602
2	90	6	2020-03-20	4.60859	502.302	802.587	0.0278181	0.000803442	0.00620543	0.00034352	34.6236	18.0642	0.00337319	19.3094	0.731936	38.4419		4.08643	10.5747		23.1302
2	90	6	2020-03-20	4.60473	501.247	77.8031	0.0268547	0.000766157	0.00599621	0.000330495	35.0512	18.1431	0.0027697	17.0963	0.601491	34.1075		4.08113	9.26395		21.8404
2	90	6	2020-03-20	4.60911	538.455	-10729.2	0.0271044	0.00073856	0.0060451	0.000324989	36.699	18.6009	0.0033866	26.4464	0.734762	49.1154		4.08546	10.3346		22.216
2	90	6	2020-03-20	4.6124	621.087	1709.87	0.0399284	0.000720874	0.00882035	0.000319969	55.3889	27.5662	0.0045285	38.5877	0.981809	62.1293		4.08859	11.1093		20.7789
2	90	6	2020-03-20	4.60879	555.705	8.21526	0.0433793	0.000711685	0.00957353	0.000315507	60.9529	30.3433	0.00227151	14.6415	0.492865	26.3476		4.08447	10.0894		20.6095
2	90	6	2020-03-20	4.61346	591.32	-7446.57	0.0433637	0.000667556	0.00955967	0.000304792	64.9589	31.3646	0.0022384	21.5253	0.48519	36.4021		4.0885	11.087		21.1223
2	90	6	2020-03-20	4.61326	626.542	4008.56	0.0465477	0.000655467	0.0102459	0.000297796	71.0146	34.4057	0.00220948	18.0742	0.478942	28.8476		4.08821	11.0146		20.6208
2	90	6	2020-03-20	4.60693	462.929	20644	0.0344642	0.000643088	0.00764026	0.000298865	53.5917	25.5642	0.00239245	15.6929	0.519316	33.8992		4.08274	9.66223		21.7646
2	90	6	2020-03-20	4.60406	489.812	1285.1	0.0353781	0.000645526	0.00784205	0.000297918	54.8051	26.3228	0.00259865	20.0869	0.564426	41.0094		4.08059	9.13041		20.7175
2	90	6	2020-03-20	4.60787	559.208	8672.45	0.0381572	0.000611249	0.00843632	0.000287904	62.425	29.3026	0.0026757	18.9247	0.58068	33.8419		4.08319	9.77448		20.2444
3	90	6	2020-06-12	4.72605	1994.25	-4551.57	0.180064	0.00074379	0.0382894	0.000349506	242.09	109.553	0.00297495	56.0871	0.62948	28.1244		4.12957	21.2433		23.4913
3	90	6	2020-06-12	4.66633	421.457	-305.377	0.0345767	0.00072354	0.00760186	0.000346851	47.7883	21.9168	0.00275861	12.1746	0.591173	28.8869		4.07739	8.33941		22.2164
3	90	6	2020-06-12	4.67239	484.632	2153.8	0.0414778	0.000696813	0.00906778	0.000339725	59.525	26.6915	0.00223832	15.2197	0.479053	31.4046		4.08191	9.45781		21.694
3	90	6	2020-06-12	4.72279	2001.5	-5268.18	0.175279	0.00068907	0.0373047	0.000336872	254.371	110.738	0.00238318	52.8471	0.504613	26.4038		4.12595	20.3477		22.5808
3	90	6	2020-06-12	4.7233	1963.85	7964.39	0.199227	0.000667024	0.0423682	0.000329812	298.681	128.462	0.00237025	48.2183	0.50182	24.553		4.12656	20.4978		22.8091
3	90	6	2020-06-12	4.72001	1977.15	-178.968	0.170614	0.000652976	0.0363341	0.000328847	261.286	110.489	0.00324236	61.2324	0.68694	30.9701		4.12455	20.0006		22.284
3	90	6	2020-06-12	4.67284	498.92	443.83	0.0420044	0.000647143	0.00917644	0.000325952	64.9075	28.1527	0.00208901	12.8427	0.447053	25.741		4.08333	9.807		21.7217
3	90	6	2020-06-12	4.72357	1994.66	-129211	0.173022	0.000637253	0.0368178	0.000323699	271.513	113.741	0.0028053	56.6289	0.593894	28.3903		4.12819	20.901		23.1481
3	90	6	2020-06-12	4.66957	454.58	681.846	0.0330227	0.000629878	0.00725727	0.000320146	52.4272	22.6686	0.00305474	13.8947	0.654181	30.5661		4.08099	9.22974		22.1978
3	90	6	2020-06-12	4.66926	520.335	3286.15	0.0416381	0.000609388	0.00910286	0.000315706	68.3277	28.8333	0.00230492	12.5145	0.493637	24.0509		4.08101	9.23448		20.6959
3	90	6	2020-06-12	4.72308	1983.22	10995.7	0.186286	0.000614553	0.0396262	0.0003148	303.124	125.877	0.00258971	78.0045	0.548309	39.3322		4.12805	20.8664		23.1371
3	90	6	2020-06-12	4.66093	458.976	-27628.9	0.0369136	0.000538481	0.00808455	0.000280457	68.5514	28.8263	0.00270356	14.0196	0.580047	30.5453		4.07795	8.47731		20.7399
3	90	6	2020-06-12	4.66561	487.056	1534.72	0.041407	0.000523614	0.0090414	0.000278568	79.0793	32.4567	0.00263316	17.6084	0.564376	36.1526		4.08205	9.49049		21.1028
3	90	6	2020-06-12	4.66024	405.972	907.885	0.0331884	0.000475106	0.00729279	0.000272979	69.8546	26.7156	0.00292874	12.3182	0.628454	30.3425		4.07632	8.07533		21.7926
3	90	6	2020-06-12	4.66676	439.813	288.797	0.0324511	0.000474537	0.00712644	0.000274158	68.3848	25.9939	0.00320306	11.2535	0.686357	25.5871		4.08119	9.27869		22.0294
3	90	6	2020-06-12	4.65847	445.382	-1613.78	0.0312391	0.000565082	0.00686696	0.000282082	55.2825	24.3439	0.00329765	12.2384	0.707883	27.4785		4.07579	7.94409		20.5489
3	90	6	2020-06-12	4.65475	416.468	392.862	0.0287911	0.000512206	0.00634822	0.00027299	56.21	23.2544	0.00402388	15.0464	0.864467	36.1285		4.0714	6.85739		20.2592
3	90	6	2020-06-12	4.66838	490.853	1922.69	0.0337978	0.000481154	0.00741222	0.00027544	70.2432	26.9105	0.00294239	15.8549	0.630282	32.3007		4.08345	9.83657		21.3663
3	90	6	2020-06-12	4.65577	347.145	-154.667	0.0240413	0.000475615	0.00533587	0.000274063	50.5479	19.4695	0.0045273	12.3834	0.972404	35.6721		4.07155	6.89398		22.7068
3	90	6	2020-06-12	4.66024	405.972	907.885	0.0331884	0.000475106	0.00729279	0.000272979	69.8546	26.7156	0.00292874	12.3182	0.628454	30.3425		4.07632	8.07533		21.7926
3	90	6	2020-06-12	4.66676	439.813	288.797	0.0324511	0.000474537	0.00712644	0.000274158	68.3848	25.9939	0.00320306	11.2535	0.686357	25.5871		4.08119	9.27869		22.0294
3	90	6	2020-06-12	4.65847	445.382	-1613.78	0.0312391	0.000565082	0.00686696	0.000282082	55.2825	24.3439	0.00329765	12.2384	0.707883	27.4785		4.07579	7.94409		20.5489
3	90	6	2020-06-12	4.65475	416.468	392.862	0.0287911	0.000512206	0.00634822	0.00027299	56.21	23.2544	0.00402388	15.0464	0.864467	36.1285		4.0714	6.85739		20.2592
3	90	6	2020-06-12	4.66838	490.853	1922.69	0.0337978	0.000481154	0.00741222	0.00027544	70.2432	26.9105	0.00294239	15.8549	0.630282	32.3007		4.08345	9.83657		21.3663
3	90	6	2020-06-12	4.65577	347.145	-154.667	0.0240413	0.000475615	0.00533587	0.000274063	50.5479	19.4695	0.0045273	12.3834	0.972404	35.6721		4.07155	6.89398		22.7068
3	90	6	2020-06-12	4.66998	484.9	-1062.77	0.0405326	0.000457033	0.00885065	0.000269011	88.6865	32.9007	0.00236023	11.0646	0.505405	22.8183		4.08144	9.34045		21.1907
3	90	6	2020-06-12	4.66228	434.882	798.129	0.0365571	0.000482656	0.00801357	0.000274516	75.7416	29.1917	0.00530019	17.4286	1.13682	40.0766		4.07471	7.67605		20.7815
3	90	6	2020-06-12	4.67182	472.181	754.759	0.0342833	0.000422349	0.00750286	0.000254651	81.173	29.4633	0.00313448	15.3093	0.670933	32.4225		4.08064	9.14258		21.2876
3	90	6	2020-06-12	4.66338	424.158	263.979	0.0287386	0.000456644	0.00633045	0.000265567	62.9344	23.8375	0.00311796	13.288	0.668604	31.328		4.0774	8.34052		21.7522
3	90	6	2020-06-12	4.6673	427.859	1115.68	0.0290023	0.000460674	0.00638136	0.000266021	62.9562	23.9882	0.00308269	19.956	0.660486	46.6416		4.08082	9.1883		22.4926
3	90	6	2020-06-12	4.67517	503.954	-462.361	0.0333674	0.000473522	0.00730837	0.000272449	70.4665	26.8247	0.00288071	19.5334	0.616172	38.7602		4.0854	10.3186		21.7542
3	90	6	2020-06-12	4.6721	450.161	-297.744	0.0301651	0.000421978	0.0066193	0.000253078	71.4851	26.1552	0.00305877	17.228	0.654688	38.2708		4.08088	9.20167		21.8951
4	75	6	2020-09-28	4.61764	508.745	-408.025	0.0365832	0.00134228	0.0081705	0.00053864	27.2545	15.1687	0.002689	19.9311	0.582331	39.177		4.08745	10.8275		22.0089
4	75	6	2020-09-28	4.61392	540.257	949.244	0.0385798	0.00131279	0.00860617	0.000529107	29.3876	16.2655	0.00223758	18.0705	0.484963	33.4479		4.08416	10.0137		20.6835
4	75	6	2020-09-28	4.61534	545.602	575.23	0.0375518	0.0012353	0.00838065	0.000512008	30.399	16.3682	0.0025009	18.428	0.541867	33.7755		4.08741	10.8166		21.4049
4	75	6	2020-09-28	4.6156	537.562	6201.72	0.038689	0.00117209	0.00862583	0.000497424	33.0087	17.341	0.00237925	20.7887	0.515479	38.6721		4.08855	11.0999		21.8114
4	75	6	2020-09-28	4.61911	556.246	-46652	0.0377894	0.00111705	0.00842394	0.000484691	33.8296	17.38	0.00234286	24.426	0.507211	43.9122		4.09189	11.9249		22.3552
4	75	6	2020-09-28	4.6157	575.824	-5.72641	0.0387798	0.00107523	0.00864239	0.000473593	36.0664	18.2486	0.00231362	25.95	0.501249	45.0658		4.08925	11.2712		21.4244
4	40	6	2020-09-28	4.62564	446.951	74.4598	0.0121251	0.000946377	0.0029211	0.000504549	12.8121	5.78951	0.0067878	51.8509	1.46743	116.01		4.07448	7.61865		22.281
4	40	6	2020-09-28	4.62743	467.612	-701.208	0.0117712	0.000867062	0.00284724	0.000490525	13.576	5.80446	0.00899375	64.1237	1.94358	137.13		4.07505	7.75966		21.9273
4	40	6	2020-09-28	4.63236	541.808	-600.493	0.0123932	0.000805869	0.0029831	0.00048165	15.3787	6.1935	0.00845179	98.9115	1.82451	182.558		4.07775	8.42721		21.095
4	40	6	2020-09-28	4.62778	489.729	-60.2926	0.0119181	0.000789821	0.00288449	0.000479663	15.0897	6.01358	0.00525218	79.3463	1.13493	162.021		4.07358	7.39626		21.0752
4	40	6	2020-09-28	4.63298	478.392	-265.869	0.0101154	0.000774585	0.00249529	0.000479033	13.0592	5.20902	0.00703404	101.783	1.51825	212.76		4.07885	8.69993		22.6244
4	40	6	2020-09-28	4.64329	646.118	-16441.9	0.0132056	0.000778333	0.00316053	0.000483872	16.9665	6.53175	0.00701898	138.675	1.51164	214.628		4.08887	11.1787		22.259
4	40	6	2020-09-28	4.63616	534.315	-2863.33	0.0113332	0.000757732	0.00275797	0.000476652	14.9568	5.78614	0.00695807	125.96	1.50083	235.742		4.0815	9.35604		22.1586
4	40	6	2020-09-28	4.6241	392.193	-373.881	0.0112027	0.000743162	0.00273802	0.000476004	15.0743	5.75209	0.00614125	23.4752	1.3281	59.8563		4.06973	6.44415		22.6359
4	40	6	2020-09-28	4.64107	570.367	737.865	0.013585	0.000743102	0.00324255	0.000475287	18.2815	6.82231	0.00697464	110.511	1.50281	193.754		4.08467	10.1387		22.3213
4	40	6	2020-09-28	4.64012	485.856	1173.77	0.0113266	0.000673822	0.00275732	0.000461288	16.8095	5.97743	0.00954599	66.0107	2.05727	135.865		4.08415	10.0117		23.7734
4	40	6	2020-09-28	4.63995	501.683	-261.353	0.0109715	0.000623711	0.00268733	0.000456582	17.5907	5.88576	0.00963929	77.0932	2.07746	153.669		4.08264	9.63774		23.0683
4	40	6	2020-09-28	4.6397	520.274	-788.349	0.0117255	0.000615365	0.0028496	0.000455002	19.0545	6.26283	0.00711269	85.1115	1.53301	163.59		4.08252	9.60845		22.6728
4	40	6	2020-09-28	4.63973	630.623	2275.44	0.0124937	0.000616001	0.00301622	0.000456053	20.2819	6.61373	0.00644468	121.67	1.38902	192.937		4.08454	10.1078		21.3946
4	40	6	2020-09-28	4.63558	640.786	244.4	0.00988678	0.000610116	0.00245319	0.000451716	16.2047	5.43083	0.0107218	177.307	2.31294	276.702		4.0789	8.71179		19.8622
4	40	6	2020-09-28	4.63558	556.844	-220.188	0.00999921	0.000607323	0.00247877	0.000452468	16.4644	5.47833	0.00786941	91.0661	1.69761	163.54		4.08089	9.20408		21.611
5	130	6	2020-09-29	4.63674	434.804	3219.22	0.0831878	0.000569586	0.0182158	0.000397576	146.05	45.8172	0.00186627	5.95069	0.402496	13.6859		4.07049	6.63146		20.1803
5	130	6	2020-09-29	4.636	440.485	1551.82	0.0860826	0.000560778	0.0188423	0.000395111	153.506	47.6887	0.00253915	12.402	0.547702	28.1554		4.07142	6.86198		20.2663
5	130	6	2020-09-29	4.64311	447.972	1905.38	0.0893429	0.000559402	0.0195164	0.000394527	159.711	49.4677	0.00155391	11.7242	0.33467	26.1719		4.0776	8.39078		21.6104
5	130	6	2020-09-29	4.64179	437.935	2201.57	0.0858591	0.000564007	0.0187684	0.000392701	152.231	47.7931	0.00173257	12.6918	0.373254	28.9809		4.07645	8.10555		21.5742
5	130	6	2020-09-29	4.64433	479.496	3036.71	0.0962875	0.000532798	0.0209941	0.000376294	180.721	55.7916	0.00165745	8.7402	0.356876	18.2279		4.07858	8.63403		21.1406
5	130	6	2020-09-29	4.64216	427.558	1525.45	0.0817547	0.000521892	0.0178765	0.000377291	156.651	47.3813	0.00169599	8.2216	0.365346	19.2292		4.07602	8.00069		21.7395
5	40	6	2020-09-29	4.64865	483.725	-18.7872	0.0152606	0.000809068	0.00355598	0.000447099	18.8619	7.95343	0.00606294	52.3183	1.30424	108.157		4.0777	8.41482		20.5863
5	40	6	2020-09-29	4.65278	434.869	-2434.18	0.0154758	0.000788691	0.00360037	0.000443465	19.6221	8.11874	0.00627615	25.7591	1.3489	59.2341		4.08238	9.57243		22.9181
5	40	6	2020-09-29	4.65983	486.587	3299.6	0.0159074	0.000778882	0.00369128	0.000444617	20.4234	8.30215	0.0070589	48.0259	1.51484	98.6995		4.08986	11.4217		23.5313
5	40	6	2020-09-29	4.65433	469.268	-283.949	0.0150886	0.000755577	0.00351792	0.0004381	19.9697	8.02995	0.00672312	60.0564	1.44449	127.979		4.08352	9.85425		22.3492
5	40	6	2020-09-29	4.64669	493.455	1803.39	0.0144354	0.000744018	0.00338059	0.000433956	19.4019	7.79017	0.00490154	77.3303	1.05484	156.712		4.07648	8.1151		20.0791
5	40	6	2020-09-29	4.66335	674.393	-111.196	0.0175495	0.00073308	0.00404267	0.000436213	23.9394	9.26765	0.00626987	67.8823	1.3445	100.657		4.09051	11.5826		20.7292
5	40	6	2020-09-29	4.65201	441.667	0.599912	0.0158803	0.00072022	0.00369429	0.000434986	22.0493	8.4929	0.00813292	35.3634	1.74826	80.0681		4.08339	9.82302		22.9907
5	40	6	2020-09-29	4.65158	445.16	-2191.44	0.0152599	0.00070685	0.00355968	0.00043099	21.5886	8.25931	0.00513086	28.6442	1.10304	64.3457		4.08009	9.00694		22.0851
5	40	6	2020-09-29	4.64747	461.711	-708.809	0.014424	0.000687038	0.00338042	0.000424299	20.9944	7.96706	0.00644506	61.0202	1.38679	132.161		4.07796	8.4808		21.1523
5	40	6	2020-09-29	4.64114	433.678	-1097.94	0.0139562	0.000670238	0.00328401	0.000421054	20.8227	7.7995	0.00744066	45.6945	1.6032	105.365		4.0712	6.8076		20.1851
5	40	6	2020-09-29	4.63934	441.676	608.75	0.0136195	0.000663746	0.00321198	0.000419125	20.5191	7.66353	0.00585485	51.2929	1.262	116.132		4.06891	6.24072		19.4082
5	40	6	2020-09-29	4.64352	376.064	-31038.6	0.0130092	0.00066088	0.00308097	0.000421548	19.6847	7.30871	0.00607507	38.4195	1.30829	102.162		4.07433	7.58156		22.7199
5	40	6	2020-09-29	4.65018	399.737	405.951	0.0136031	0.000657811	0.00320253	0.000418407	20.6794	7.65409	0.00684446	44.6049	1.47187	111.586		4.08046	9.09859		23.4554
5	40	6	2020-09-29	4.64276	404.38	-1134.08	0.0136186	0.000657694	0.00320911	0.000417161	20.7067	7.69274	0.00657588	36.1349	1.41638	89.3586		4.07323	7.31038		21.524
5	40	6	2020-09-29	4.65084	400.196	18.3351	0.013232	0.000641645	0.00312121	0.0004139	20.6219	7.54097	0.00828552	30.89	1.78151	77.1873		4.07879	8.68554		23.028
5	40	6	2020-09-29	4.64743	421.495	7.71053	0.013528	0.000641278	0.00318646	0.000413503	21.0955	7.70603	0.00699093	44.1067	1.50426	104.644		4.0758	7.94638		21.6582
5	40	6	2020-09-29	4.64208	411.27	-645.305	0.013139	0.000629587	0.00310624	0.000411328	20.8693	7.55175	0.00575567	39.8603	1.23989	96.92		4.07132	6.8387		20.8456
6	40	6	2020-10-01	4.64259	434.393	366.568	0.0166333	0.000740519	0.00383529	0.000411774	22.4617	9.31409	0.00527266	40.2362	1.13572	92.6263		4.07642	8.09788		21.3957
6	40	6	2020-10-01	4.64345	481.351	-287.824	0.0166242	0.000695073	0.00383197	0.000401517	23.9172	9.54374	0.00464092	45.8777	0.999456	95.3102		4.07848	8.60932		20.7712
6	40	6	2020-10-01	4.64097	438.791	343.214	0.0150671	0.000683597	0.00349776	0.000398185	22.0409	8.78426	0.00749089	33.3733	1.61408	76.0575		4.07513	7.78066		20.9623
6	40	6	2020-10-01	4.63634	380.036	126.872	0.0133004	0.000646985	0.00311941	0.000390074	20.5575	7.99696	0.00725672	41.3768	1.56518	108.876		4.07092	6.73967		21.6822
6	40	6	2020-10-01	4.64512	455.519	-1177.81	0.0155735	0.000617966	0.00360314	0.000383349	25.2012	9.39911	0.00675676	37.3121	1.45459	81.9113		4.07941	8.83834		21.5976
6	40	6	2020-10-01	4.64012	480.149	20042.4	0.0152749	0.00058702	0.00353923	0.000373706	26.0212	9.47063	0.00469083	49.0372	1.01093	102.129		4.07251	7.13182		19.3201
6	40	6	2020-10-01	4.63847	361.671	-2869.3	0.0132734	0.000568786	0.00310851	0.000369555	23.3364	8.41151	0.00646561	23.4195	1.39391	64.7535		4.0747	7.67343		23.277
6	40	6	2020-10-01	4.63933	396.768	-660.576	0.0134614	0.000562067	0.00314633	0.000365796	23.9498	8.6013	0.00765889	35.8398	1.65086	90.3294		4.07415	7.53657		21.9274
6	40	6	2020-10-01	4.64436	402.025	-100.323	0.0142431	0.000551771	0.00330939	0.000361411	25.8133	9.15686	0.00697454	47.4956	1.50172	118.141		4.07587	7.96276		22.1892
6	40	6	2020-10-01	4.63616	380.626	2459.01	0.0129368	0.00052961	0.00303099	0.000354783	24.4269	8.54323	0.00554922	39.6703	1.19694	104.224		4.0675	5.89395		20.8162
6	40	6	2020-10-01	4.63375	471.959	-114.856	0.0133853	0.000521796	0.00312914	0.000353041	25.6524	8.86341	0.00688616	47.4598	1.48609	100.559		4.06947	6.37934		18.7512
6	40	6	2020-10-01	4.64455	447.022	-3585.68	0.0132258	0.000517433	0.00308668	0.000350531	25.5605	8.80573	0.00537491	44.0692	1.15725	98.5839		4.07647	8.11172		21.0818
7	40	6	2020-10-02	4.6171	531.909	-2657.04	0.0137664	0.000454085	0.00319029	0.000307096	30.3167	10.3886	0.00561653	83.1126	1.21646	156.253		4.07719	8.28973		19.2852
7	40	6	2020-10-02	4.62794	496.654	584.27	0.0150438	0.000491092	0.00345699	0.00031281	30.6333	11.0514	0.00454078	58.6563	0.981167	118.103		4.08532	10.3002		21.9905
7	40	6	2020-10-02	4.61969	440.191	877.93	0.0131143	0.000499318	0.00304425	0.000313564	26.2643	9.70854	0.00687361	42.4658	1.48789	96.4714		4.07725	8.30426		21.333
7	40	6	2020-10-02	4.61858	423.029	-69.7568	0.01303	0.000484667	0.00302285	0.000306491	26.8844	9.86279	0.00605632	42.9772	1.31129	101.594		4.0773	8.31547		21.8201
7	40	6	2020-10-02	4.618	542.503	-624.75	0.0142336	0.000480537	0.00327811	0.000299942	29.6201	10.9292	0.00522768	70.0291	1.13202	129.085		4.0765	8.11933		18.9233
7	40	6	2020-10-02	4.60063	305.234	-322.74	0.00922532	0.000466924	0.00220083	0.000296552	19.7576	7.42141	0.0103188	27.5513	2.2429	90.2627		4.06254	4.66684		22.8399
7	40	6	2020-10-02	4.61224	475.659	-185.06	0.0130005	0.000462814	0.00301043	0.000292101	28.09	10.3061	0.00564116	47.4896	1.22308	99.8397		4.07287	7.22053		19.3722
7	40	6	2020-10-02	4.62401	458.859	293.858	0.0135237	0.0004544	0.00311531	0.000288719	29.7618	10.7901	0.00778275	51.0095	1.68312	111.166		4.0799	8.95978		21.5104
7	40	6	2020-10-02	4.61839	421.316	107.406	0.0119825	0.000455177	0.0027863	0.000290242	26.325	9.59995	0.00775858	61.2081	1.67993	145.279		4.07593	7.97896		21.5331
7	40	6	2020-10-02	4.61817	404.749	507.647	0.0125125	0.000438013	0.00289641	0.00028153	28.5664	10.2881	0.00692239	34.337	1.49895	84.8352		4.07703	8.25077		22.3055
7	40	6	2020-10-02	4.62076	445.406	-1001.16	0.029929	0.000407201	0.00666069	0.00027174	73.4994	24.5112	0.00286406	19.6634	0.619825	44.1472		4.07951	8.86326		21.7545
7	40	6	2020-10-02	4.62013	451.634	662.467	0.028256	0.000384066	0.00629765	0.000264805	73.5706	23.7822	0.00370551	15.2197	0.802036	33.6992		4.07852	8.61935		21.3504
7	40	6	2020-10-02	4.61817	404.749	507.647	0.0125125	0.000438013	0.00289641	0.00028153	28.5664	10.2881	0.00692239	34.337	1.49895	84.8352		4.07703	8.25077		22.3055
7	40	6	2020-10-02	4.62076	445.406	-1001.16	0.029929	0.000407201	0.00666069	0.00027174	73.4994	24.5112	0.00286406	19.6634	0.619825	44.1472		4.07951	8.86326		21.0467
7	40	6	2020-10-02	4.62013	451.634	662.467	0.028256	0.000384066	0.00629765	0.000264805	73.5706	23.7822	0.00370551	15.2197	0.802036	33.6992		4.07852	8.61935		20.6454
8	74	6	2020-12-03	4.63179	459.089	8780.24	0.0235411	0.000982448	0.00533534	0.000465076	23.9617	11.472	0.00230199	11.1506	0.496108	22.4191		4.07929	8.80956		22.4191
8	74	6	2020-12-03	4.62501	368.641	-41.5333	0.0174898	0.000881423	0.00403747	0.000446483	19.8427	9.04284	0.00420965	9.34363	0.907653	22.8626		4.06992	6.49137		22.8626
8	74	6	2020-12-03	4.63625	444.423	360.363	0.0205191	0.000823277	0.00468211	0.000434007	24.9237	10.7881	0.00357555	10.7705	0.770856	22.6867		4.07886	8.70166		22.6867
8	74	6	2020-12-03	4.63407	465.124	7259.75	0.0194433	0.000795878	0.0044556	0.000431538	24.43	10.3249	0.00360962	10.284	0.778205	21.3747		4.07567	7.91318		21.3747
8	74	6	2020-12-03	4.62214	396.424	-279.848	0.0168375	0.000695128	0.00389887	0.000406264	24.2221	9.59689	0.00365706	11.4633	0.788441	20.3831		4.06383	4.98655		20.3831
8	74	6	2020-12-03	4.63791	418.732	96.3768	0.0174802	0.000640716	0.0040276	0.000396766	27.2823	10.1511	0.00366459	15.5254	0.790065	22.8869		4.07676	8.18432		22.8869
8	90	6	2020-12-04	4.65568	473.861	-1311.66	0.0524534	0.00190124	0.0115369	0.000678596	27.589	17.0011	0.00234271	7.36002	0.504892	20.3452		4.07592	7.9756		20.3452
8	90	6	2020-12-04	4.6521	449.722	-2551.77	0.0485237	0.00193739	0.0107028	0.000688729	25.0459	15.54	0.00360574	7.90781	0.77737	20.1201		4.0734	7.35229		20.1201
8	90	6	2020-12-04	4.65184	455.102	-3071.8	0.0496878	0.0018651	0.0109548	0.000674141	26.6409	16.25	0.00317758	9.81589	0.685	19.7777		4.07239	7.10163		19.7777
8	90	6	2020-12-04	4.65751	491.092	799.187	0.0523522	0.00174943	0.0115156	0.00065083	29.9252	17.6937	0.00261269	8.2165	0.563137	20.2909		4.07677	8.18555		20.2909
8	90	6	2020-12-04	4.65418	433.797	940.664	0.0414703	0.00142601	0.0091718	0.000567849	29.0813	16.1518	0.00225847	7.63531	0.48672	20.6634		4.07403	7.50877		20.6634
8	90	6	2020-12-04	4.6562	478.994	2754.09	0.0467709	0.0013789	0.0103038	0.000555123	33.9189	18.5613	0.00186605	7.70628	0.402062	20.3435		4.07631	8.07262		20.3435
8	90	6	2020-12-04	4.66091	461.496	-1633.96	0.044108	0.00116665	0.00972703	0.000513698	37.8076	18.9353	0.00240584	10.875	0.518511	21.7578		4.08072	9.16301		21.7578
8	90	6	2020-12-04	4.65909	488.496	-11659.1	0.0394446	0.00108638	0.00872982	0.000496839	36.3084	17.5707	0.00223349	9.28951	0.481329	20.633		4.07816	8.52939		20.633
8	90	6	2020-12-04	4.65466	424.996	-1533.55	0.0410159	0.00107551	0.00907105	0.000490567	38.1363	18.491	0.00263578	8.59112	0.568118	20.9153		4.07428	7.56927		20.9153
8	90	6	2020-12-04	4.65713	414.804	491.436	0.0403733	0.000949718	0.00893056	0.000465296	42.5108	19.1933	0.00237123	5.89473	0.511046	21.571		4.076	7.99428		21.571
8	90	6	2020-12-04	4.65198	421.903	244.53	0.0381711	0.000909376	0.00846619	0.000456338	41.9751	18.5524	0.00210069	7.94683	0.452681	20.5518		4.07253	7.13673		20.5518
9	90	6	2020-12-05	4.609	291.768	2697.5	0.0207908	0.000399482	0.00471039	0.000286174	52.0445	16.4599	0.00743478	9.97033	1.60342	21.0572		4.05882	3.74716		21.0572
9	90	6	2020-12-05	4.61637	376.231	-280.177	0.0243646	0.000389367	0.00546774	0.000274162	62.5749	19.9435	0.00332251	10.0514	0.716267	19.6054		4.066	5.52246		19.6054
9	90	6	2020-12-05	4.62423	379.255	-18136.8	0.0245924	0.000377851	0.0055072	0.000270634	65.0848	20.3492	0.00559002	9.81169	1.20544	21.5968		4.07442	7.60498		21.5968
9	90	6	2020-12-05	4.62067	388.533	-9516.9	0.0253123	0.000371229	0.00566452	0.000266571	68.1851	21.2496	0.00417692	10.4807	0.90059	20.513		4.07114	6.79264		20.513
9	90	6	2020-12-05	4.62287	391.906	2490.94	0.0257796	0.000367567	0.00576059	0.000263555	70.1358	21.8573	0.00426849	18.0951	0.920345	20.7975		4.07268	7.173		20.7975
9	90	6	2020-12-05	4.62395	384.324	-55.9499	0.0232201	0.000388806	0.00520352	0.000265878	59.7216	19.5711	0.0048038	11.2324	1.03583	21.4396		4.07439	7.59758		21.4396

## Sheet: UWC-1
				raw ratios			raw voltages				signal/background ratios		ratio 2SE		ratio 2RSE			NIST SRM612 standardised			B/Ca corrected
session	beam diameter (um)	repetition rate (Hz)		11/10	11/10.089	11/10.5	11B signal	11B gas blank	10B signal	10B gas blank	11B	10B	11/10	11/10.089	11/10 (permil)	11/10.089 (%)		11/10	d11B (NIST951)		d11B (NIST951)
1	90	6		4.55454	678.573	-2592.21	0.0458125	0.00161412	0.0102228	0.000518272	28.3823	19.7247	0.00304521	67.4454	0.66861	9.9393		4.03838	-1.30868		8.57136
1	90	6		4.55248	661.178	-325.465	0.046396	0.00143596	0.0103581	0.00048281	32.3102	21.4539	0.00257886	48.4619	0.566472	7.32963		4.03728	-1.57993		8.50757
1	90	6		4.55157	625.254	1660.64	0.0392296	0.00108977	0.00878546	0.00040623	35.9981	21.6268	0.00200283	30.806	0.440031	4.92695		4.03519	-2.09684		8.45118
1	90	6		4.54615	528.744	2730.73	0.0387762	0.000982733	0.00869378	0.000381928	39.4575	22.7629	0.00467525	51.8291	1.0284	9.8023		4.0301	-3.35601		8.6985
1	90	6		4.55029	557.726	84292.3	0.04113	0.000852137	0.00920521	0.000353205	48.2669	26.0619	0.00333076	30.6548	0.731989	5.49639		4.03387	-2.42252		9.13134
1	90	6		4.54422	474.1	1113.35	0.0326792	0.00079813	0.00735455	0.000340016	40.9447	21.63	0.00370975	28.8538	0.816366	6.086		4.02935	-3.54133		9.60255
1	90	6		4.53384	410.333	1469.23	0.0292547	0.000808913	0.00661463	0.000340768	36.1654	19.411	0.00342891	21.9547	0.756293	5.35045		4.01919	-6.05497		8.67887
1	90	6		4.54886	494.766	-22099.6	0.0367133	0.000760811	0.0082315	0.000329218	48.2555	25.0032	0.00484572	61.1268	1.06526	12.3547		4.03161	-2.98264		9.72429
1	90	6		4.54576	510.575	-4325.25	0.0459883	0.000745052	0.0102773	0.000325358	61.7249	31.5877	0.00220942	25.5827	0.48604	5.01056		4.03123	-3.07608		8.14739
1	90	6		4.54983	573.294	845.704	0.05207	0.000704973	0.0116039	0.000315212	73.861	36.8128	0.00268553	29.5687	0.590248	5.15769		4.03222	-2.83242		7.4413
1	90	6		4.53971	412.038	133.203	0.0380404	0.000693489	0.0085343	0.000310338	54.8537	27.5	0.00492068	24.2505	1.08392	5.88551		4.02313	-5.0805		8.16605
1	90	6		4.55266	590.105	913.64	0.0488766	0.000679024	0.0108921	0.000304872	71.9807	35.7267	0.00412276	46.9457	0.905571	7.95548		4.03462	-2.23766		7.81331
1	90	6		4.54875	570.456	869.205	0.0513928	0.000619324	0.0114467	0.000288532	82.9821	39.6723	0.00332648	49.0093	0.731296	8.59125		4.031	-3.13368		7.17885
1	90	6		4.54901	509.275	560.139	0.0416746	0.000602798	0.00931286	0.000285847	69.1352	32.5799	0.00303035	38.2149	0.666156	7.50379		4.03104	-3.12419		8.12124
2	90	6		4.61558	540.448	-885.94	0.0374548	0.000531609	0.00827762	0.000278315	70.4555	29.7419	0.00342582	31.8489	0.742229	5.89306		4.03827	-1.3357		9.21533
2	90	6		4.61141	508.226	190902	0.0353372	0.000499157	0.0078293	0.000274573	70.7937	28.5145	0.00269234	17.1062	0.583844	3.36586		4.03372	-2.46057		8.70603
2	90	6		4.6099	520.806	128.163	0.0347955	0.000474076	0.00771682	0.000271663	73.3964	28.4058	0.00304122	24.2044	0.659715	4.64748		4.03146	-3.01995		7.89786
2	90	6		4.60542	420.778	763.098	0.0308594	0.000475333	0.00686781	0.000270347	64.9215	25.4037	0.0038566	12.0343	0.837406	2.86002		4.02502	-4.61275		8.89863
2	90	6		4.61758	527.437	748.068	0.0362974	0.000459966	0.00802605	0.000265284	78.9132	30.2546	0.00332919	25.7356	0.720983	4.87937		4.03548	-2.02594		8.93859
2	90	6		4.61709	482.967	1081.36	0.0317119	0.000424598	0.00703095	0.000254632	74.6869	27.6122	0.00402086	27.961	0.870864	5.78942		4.03283	-2.68108		9.21305
3	130	4		4.57811	438.657	1566.18	0.0477541	0.00151387	0.0106135	0.000513168	31.5444	20.6823	0.00239951	9.93097	0.524126	2.26395		4.02426	-4.80045		8.89547
3	130	4		4.58205	484.517	-611.358	0.0524489	0.00157959	0.011639	0.000536951	33.2042	21.6761	0.00216608	17.3731	0.472731	3.58565		4.02772	-3.94364		9.55903
3	130	4		4.59094	620.327	1032.15	0.0636707	0.00157572	0.014058	0.00053271	40.4073	26.3897	0.00454218	42.0924	0.989379	6.78553		4.03554	-2.01128		7.28398
3	130	4		4.58342	433.952	3872.09	0.0478412	0.001613	0.0106295	0.000543543	29.6598	19.5559	0.00232355	11.5413	0.506947	2.65957		4.02893	-3.64634		8.36411
3	130	4		4.5823	593.653	38270.9	0.0660903	0.00159019	0.0146212	0.000533695	41.5611	27.3961	0.00691485	68.8646	1.50903	11.6001		4.02794	-3.88891		7.16834
3	130	4		4.58299	511.835	738.985	0.0552892	0.00161715	0.012251	0.000540165	34.1893	22.6801	0.0025068	19.9391	0.546979	3.89562		4.02855	-3.74038		8.2734
3	90	6		4.58782	518.365	2002.5	0.038843	0.00162532	0.00866265	0.000550266	23.8986	15.7426	0.00172879	21.2262	0.376822	4.09483		4.03231	-2.81043		8.33086
3	90	6		4.58852	525.185	227.501	0.0401056	0.00154357	0.00893644	0.00053096	25.9824	16.8307	0.00411539	45.6299	0.896887	8.68834		4.03341	-2.53675		8.51899
3	75	6		4.58481	466.159	-4475.11	0.0272557	0.00235509	0.00612362	0.000692647	11.5731	8.8409	0.00406475	21.7564	0.886568	4.66716		4.02774	-3.9389		8.76745
3	75	6		4.58801	542.62	194.951	0.0310681	0.00224034	0.00695548	0.000671967	13.8676	10.3509	0.00312681	28.9733	0.681517	5.33953		4.03111	-3.10637		8.70503
3	75	6		4.57665	408.748	-872.055	0.0232212	0.00217519	0.00526231	0.000663764	10.6755	7.92799	0.00496192	17.7094	1.08418	4.33259		4.02113	-5.57424		7.93759
4	75	6		4.54825	406.011	674.376	0.0304396	0.00126718	0.00693627	0.000522338	24.0215	13.2793	0.00321215	12.5461	0.706238	3.09008		4.02603	-4.362		8.97259
4	75	6		4.56	478.315	-184.805	0.0340606	0.00118774	0.00771063	0.000500989	28.6769	15.3908	0.00504705	31.2865	1.10681	6.54097		4.0384	-1.30348		10.4289
4	75	6		4.56553	603.701	181.533	0.041928	0.00112813	0.00942163	0.000486181	37.1659	19.3788	0.00548116	71.7602	1.20055	11.8867		4.0442	0.130734		9.91742
4	75	6		4.52425	254.218	-518.503	0.0188878	0.0010716	0.00440926	0.000473819	17.6259	9.30579	0.00759993	25.589	1.67982	10.0657		4.00786	-8.85652		10.3914
4	75	6		4.54907	444.155	-379.472	0.0321835	0.00103128	0.00731016	0.000461324	31.2075	15.8461	0.00424658	25.1493	0.933505	5.66228		4.03021	-3.32827		9.1027
4	40	6		4.56	365.797	-1750.79	0.00875451	0.000839908	0.00222273	0.000486976	10.4232	4.56434	0.0105236	39.574	2.3078	10.8186		4.01476	-7.14835		9.92264
4	40	6		4.57864	653.525	-292.379	0.0129402	0.000810511	0.00313199	0.00048288	15.9655	6.48607	0.00585809	117.467	1.27944	17.9744		4.03046	-3.26731		7.71729
4	40	6		4.57927	599.506	216.841	0.0130378	0.000766386	0.00315467	0.000474837	17.0121	6.6437	0.00732417	121.632	1.59942	20.2886		4.03167	-2.96849		8.7612
4	40	6		4.587	636.109	-988.046	0.0138262	0.000713318	0.00333051	0.000471318	19.383	7.06637	0.00688569	157.434	1.50113	24.7495		4.03689	-1.67763		9.53505
4	40	6		4.57353	606.398	647.545	0.0110482	0.000692568	0.00272867	0.000464103	15.9524	5.87944	0.00839878	169.251	1.83639	27.9109		4.02532	-4.53844		7.08972
4	40	6		4.58049	521.577	575.833	0.0128687	0.000654904	0.0031213	0.000454662	19.6498	6.8651	0.00562663	64.4475	1.22839	12.3563		4.03181	-2.93204		10.1075
5	40	6		4.59891	499.596	256.775	0.0168083	0.000762474	0.0039289	0.000439328	22.0444	8.94298	0.00536359	51.2143	1.16627	10.2511		4.03639	-1.801		10.0359
5	40	6		4.59422	452.684	-1238.39	0.0161516	0.000737981	0.00379266	0.00043751	21.8862	8.66874	0.00597537	54.1563	1.30063	11.9634		4.02951	-3.50195		9.38787
5	40	6		4.58518	412.4	-3.53231	0.0143124	0.00071729	0.00339592	0.000430598	19.9534	7.88652	0.0067516	39.9114	1.47248	9.67783		4.02225	-5.29594		8.67766
5	40	6		4.58385	434.831	-1269.52	0.0142009	0.000678153	0.00337184	0.000425186	20.9405	7.93025	0.00988386	113.649	2.15624	26.1363		4.02226	-5.29397		8.05275
5	40	6		4.59521	548.265	4806.15	0.0160137	0.000658095	0.00375818	0.000416923	24.3333	9.01409	0.00615405	82.7501	1.33923	15.0931		4.03149	-3.01276		7.91262
5	40	6		4.59181	418.639	209.866	0.0143824	0.000686784	0.00339777	0.00041446	20.9417	8.19805	0.00907596	49.3326	1.97655	11.784		4.02702	-4.11688		9.67598
6	40	6		4.57077	379.504	46.0138	0.0134414	0.000765007	0.00319012	0.000417014	17.5703	7.6499	0.00649538	52.8115	1.42107	13.9159		4.01383	-7.3793		7.58153
6	40	6		4.56894	316.285	-575.516	0.0124239	0.000660092	0.00297031	0.000395546	18.8214	7.50939	0.00771359	31.199	1.68827	9.8642		4.01175	-7.89479		9.65266
6	40	6		4.58568	458.624	-21375.4	0.0156259	0.00063127	0.00365669	0.000386723	24.7531	9.45558	0.00473991	37.8536	1.03363	8.25373		4.02619	-4.32161		8.3625
6	40	6		4.58859	441.313	-87.757	0.0152717	0.000628593	0.0035772	0.000385828	24.295	9.2715	0.0074261	37.1838	1.61838	8.42572		4.02604	-4.35992		8.75609
6	40	6		4.57005	365.366	-748.511	0.0103854	0.00059709	0.00252199	0.000379938	17.3934	6.63789	0.00814881	51.0699	1.78309	13.9777		4.01178	-7.88611		7.57944
6	40	6		4.59591	533.806	1735.62	0.0160467	0.000575973	0.00373791	0.000372597	27.8601	10.032	0.00674546	96.6045	1.46771	18.0973		4.03275	-2.70171		8.41623
6	40	6		4.51929	199.363	2935.29	0.00712325	0.000552936	0.00181617	0.000362468	12.8826	5.01058	0.0136822	18.7715	3.02751	9.41576		3.9672	-18.91		7.42662
6	40	6		4.57824	399.615	268.555	0.0121643	0.000539467	0.00289687	0.000357465	22.5487	8.10391	0.00821587	48.4296	1.79455	12.1191		4.0181	-6.32427		7.97703
6	40	6		4.57995	351.636	208.943	0.0110846	0.000531817	0.00266003	0.000355878	20.8429	7.47455	0.00971745	42.5935	2.12174	12.1129		4.01902	-6.09505		9.89736
6	40	6		4.58321	465.372	405.713	0.0147359	0.000523152	0.00345487	0.000353707	28.1675	9.76761	0.00485603	39.5654	1.05953	8.50189		4.02145	-5.49568		7.02832
6	40	6		4.59575	445.255	29.1036	0.0134589	0.000523263	0.00317109	0.000356469	25.7211	8.89585	0.00966257	54.0224	2.1025	12.1329		4.03352	-2.5104		10.5045
7	40	6		4.55979	420.578	142.957	0.0123444	0.000459435	0.00292132	0.000314512	26.8687	9.28842	0.00715535	43.3725	1.56923	10.3126		4.02634	-4.28588		9.28977
7	40	6		4.56645	611.669	296.822	0.0147382	0.000497113	0.00342895	0.000310067	29.6475	11.0587	0.00586089	85.4422	1.28347	13.9687		4.03046	-3.26797		6.44518
7	40	6		4.56597	450.832	11.3996	0.0123555	0.000493895	0.00290998	0.000311992	25.0164	9.3271	0.00574982	64.9117	1.25928	14.3982		4.03192	-2.90654		9.84488
7	40	6		4.56362	466.917	-1120.94	0.0138538	0.000480117	0.00323355	0.000303075	28.8551	10.6691	0.00686126	37.9441	1.50347	8.12653		4.02805	-3.86211		8.49364
7	40	6		4.56483	464.029	581.721	0.0134538	0.000470152	0.00314031	0.000296406	28.6159	10.5946	0.00655504	53.643	1.43599	11.5603		4.03041	-3.2791		9.14572
7	40	6		4.56677	431.966	2394.32	0.0110637	0.000462957	0.0026167	0.00029533	23.8978	8.86026	0.00835671	61.0997	1.82989	14.1446		4.03076	-3.19245		10.0597
7	40	6		4.57043	498.59	258.131	0.0136174	0.000461246	0.00316986	0.000291055	29.5231	10.8909	0.00928969	90.6577	2.03257	18.1828		4.03477	-2.20174		9.44785
7	40	6		4.56221	374.365	3562.88	0.0105938	0.000449355	0.00251099	0.00028746	23.5755	8.73509	0.00681761	38.0942	1.49436	10.1757		4.02636	-4.28122		10.8039
7	40	6		4.53088	278.346	100.76	0.00826119	0.000427056	0.00200527	0.000276746	19.3445	7.24587	0.0105597	32.8985	2.33062	11.8193		3.99985	-10.8378		8.93971
7	40	6		4.56473	488.796	1285.34	0.0335932	0.000415928	0.00754553	0.000277569	80.767	27.1843	0.00221507	36.4871	0.485257	7.46469		4.03002	-3.3765		7.79548
7	40	6		4.54796	351.969	-1217.69	0.0241477	0.000385719	0.00549045	0.000266112	62.6044	20.6321	0.00433076	25.7064	0.952241	7.30359		4.01521	-7.03825		8.19174
8	90	6		4.60141	417.799	2508.75	0.0449306	0.00184346	0.0100335	0.00066978	24.373	14.9803	0.00181934	18.8395	0.395776	4.50923		4.02824	-3.81566		9.53721
8	90	6		4.60029	440.766	3532.89	0.0472694	0.0018557	0.0105443	0.000672717	25.4725	15.6741	0.00193203	23.4728	0.420502	5.32546		4.02686	-4.15722		8.76762
8	90	6		4.60152	409.888	1164.43	0.0454651	0.00180272	0.0101515	0.000662634	25.2203	15.3199	0.00186608	14.0449	0.406031	3.42652		4.02808	-3.85638		9.65313
8	90	6		4.59978	367.034	1213.54	0.0385654	0.00162496	0.00863775	0.00060672	23.7331	14.2368	0.00179153	8.83453	0.389674	2.40701		4.02737	-4.03011		10.7778
8	90	6		4.59639	373.748	165.782	0.0392345	0.00163882	0.00877726	0.000607938	23.9407	14.4378	0.00182766	39.6808	0.397601	10.617		4.0233	-5.03692		9.58114
8	90	6		4.59943	387.84	-710.937	0.0386224	0.00124134	0.00865803	0.000530501	31.1135	16.3205	0.00183556	14.1115	0.399334	3.63848		4.02709	-4.10029		10.1383
8	90	6		4.60635	420.236	1884.29	0.0424464	0.00112161	0.00947051	0.000500497	37.8441	18.9222	0.00208953	30.5886	0.455061	7.27892		4.03227	-2.82002		10.6325
8	90	6		4.59411	393.753	-238.315	0.0377452	0.00106646	0.0084722	0.000489198	35.3931	17.3186	0.00186963	33.4039	0.406809	8.48347		4.02128	-5.53807		8.54849
8	90	6		4.59803	379.885	991.141	0.0363951	0.000971482	0.00817443	0.00047045	37.4635	17.3758	0.00185543	13.1539	0.403694	3.46259		4.02448	-4.74631		9.70341
8	90	6		4.60836	516.447	2233.57	0.0485948	0.000932726	0.010805	0.000462367	52.0997	23.369	0.00248524	24.9346	0.541889	4.82811		4.03331	-2.56196		9.08159
8	74	6		4.58402	519.062	1948.48	0.0214269	0.000637846	0.00492973	0.000394141	33.5926	12.5075	0.00260836	32.1083	0.568904	6.18583		4.02909	-3.60484		8.67856
8	74	6		4.56872	346.42	184.739	0.0144458	0.000663213	0.00341673	0.000400207	21.7815	8.53742	0.00150777	20.7484	0.327409	5.98939		4.01629	-6.77148		10.4851
8	74	6		4.57312	415.083	808.196	0.0173169	0.000716738	0.00404272	0.000412954	24.1608	9.78976	0.00174519	26.0625	0.379504	6.27886		4.02141	-5.50611		9.30513
8	74	6		4.56428	351.849	-2075.95	0.0162823	0.000792903	0.00382262	0.000429132	20.535	8.9078	0.00159705	22.1522	0.347	6.29595		4.01429	-7.26595		9.76456
8	74	6		4.56176	386.656	216.881	0.0188796	0.000931134	0.0043862	0.00045186	20.276	9.70698	0.00176277	23.2339	0.383362	6.00894		4.01551	-6.96292		8.76117

## Sheet: silicate glasses
Calibration data			raw ratios								ratios uncertainty (2SE)			NIST612
Session 1	repetition rate	spot size	11/9.95	11/10	11/10.089	11/10.5	11B sig. (V)	11B bg (V)	10B sig. (V)	10B bg (V)	11/9.95 2SE	11/10.089 2SE	11/10.5 2SE	11/10 mass bias corrected	sample/NIST 11B V ratio	raw d11B	approx. [B] (ppm)	11/10 2SE (permil)
BCR-2G	6	74	948.62	4.582	1016.1	491.548	0.0193808	0.000784481	0.0045164	0.000457742	108.291	153.895	604.59	4.02426	0.119597	-4.80067	4.10217	0.994846
BCR-2G	6	74	873.72	4.58092	999.907	-1975.51	0.0181064	0.000690019	0.00422934	0.000427262	162.561	137.968	5820.23	4.02565	0.115881	-4.45658	3.97472	0.905263
BCR-2G	6	74	795.359	4.56928	927.09	-545.757	0.0170566	0.000577027	0.0039745	0.000367767	91.519	166.185	835.774	4.02168	0.123621	-5.43705	4.2402	0.802716
BCR-2G	6	74	823.877	4.56483	1195.28	-581.443	0.014654	0.000533622	0.00343466	0.000341324	129.527	389.961	1165.57	4.01765	0.112585	-6.4348	3.86166	1.03976
BCR-2G	6	74	995.495	4.57119	1444.73	1864.81	0.0143666	0.000472512	0.00336118	0.000321564	190.587	645.195	2623.24	4.02492	0.113929	-4.63697	3.90777	1.18209
GOR128-G	6	74	2937.64	4.66773	-14398	-553.289	0.0263751	0.00117122	0.00591317	0.000513484	11243.3	16015.3	1956.28	4.10924	0.515134	16.2159	17.6691	0.642162
GOR128-G	6	74	2319.31	4.67217	2561.3	-3228.28	0.0258196	0.00112987	0.00579429	0.000509696	6324.89	4180.96	6075.73	4.11454	0.51374	17.5269	17.6213	0.635864
GOR128-G	6	74	-19.2167	4.66828	9406.4	-2616.16	0.024695	0.00110228	0.00555169	0.000497734	5333.92	12868.6	5440.08	4.11112	0.491364	16.68	16.8538	0.66389
GOR128-G	6	74	-9033.19	4.66662	8989.26	-1655.35	0.0251584	0.00108447	0.00565149	0.000492414	12223.3	26052.3	3094	4.10965	0.500584	16.3174	17.17	0.858809
GOR132-G	6	74	-77.387	4.63555	-1529.52	933.477	0.021005	0.00131853	0.00479793	0.000551145	2845.6	2228.73	762.826	4.08033	0.40826	9.06485	14.0033	0.729618
GOR132-G	6	74	3332.96	4.63187	239.651	-4528.05	0.0205311	0.00128904	0.00469751	0.000542927	2900.94	6554.82	9293.58	4.07709	0.399049	8.26472	13.6874	0.823533
GOR132-G	6	74	762.181	4.63454	-851.09	285.666	0.019022	0.0010833	0.00436731	0.000496439	3780.29	3097.74	509.474	4.0814	0.378486	9.33096	12.9821	0.910002
GOR132-G	6	74	-2805.51	4.62387	3421.43	-31185.6	0.0195792	0.00104787	0.00449119	0.000483185	7837.68	3645.13	61766.4	4.072	0.389572	7.00705	13.3623	0.743457
Session 2
BCR-2G	6	70	786.458	4.59833	831.995	1026.38	0.0189716	0.00087424	0.00438591	0.000450017	116.558	94.2103	887.242	4.02799	0.124256	-3.87648	4.26198	0.900336
BCR-2G	6	70	877.486	4.595	1235.62	619.993	0.0188821	0.000894839	0.00436615	0.000451534	122.589	247.282	1272.04	4.02508	0.12367	-4.59832	4.24186	0.812609
BCR-2G	6	70	1205.02	4.60228	464.901	28055.6	0.0190239	0.000896787	0.00439588	0.000456962	332.832	2177.46	56311.4	4.03145	0.124598	-3.02238	4.27372	0.969047
BCR-2G	6	70	971.961	4.59807	941.478	-690.023	0.0200808	0.000876304	0.0046266	0.000449658	156.128	129.95	2213.89	4.02776	0.131521	-3.93395	4.51116	0.932917
BCR-2G	6	70	986.815	4.60108	1455.43	1053	0.0196564	0.000906766	0.00453197	0.00045669	178.302	372.724	1220.26	4.0304	0.128741	-3.28202	4.41581	1.07265
BCR-2G	6	70	1298.19	4.59513	7748.09	-641.493	0.0187329	0.000875948	0.00433128	0.000445034	661.847	8861.17	1122.53	4.02589	0.125789	-4.39675	4.31458	0.898839
GOR128-G	6	70	3186.03	4.69198	8324.13	-638.823	0.0697343	0.000845148	0.0151185	0.000436007	4611.37	1941.05	1552	4.11075	0.468259	16.5882	16.0613	0.411397
GOR128-G	6	70	784569	4.69198	11124.9	-2216.14	0.0717062	0.000856	0.0155412	0.000440731	1.61382e+06	8778.84	4133.75	4.11074	0.4815	16.5863	16.5155	0.386197
GOR128-G	6	70	50765.1	4.69345	-114919	-4561.02	0.0691846	0.000839085	0.0150014	0.000438996	78104	258214	9556.32	4.11203	0.464568	16.9054	15.9347	0.429767
GOR128-G	6	70	5124.42	4.68565	31979.6	9107.71	0.0672347	0.000804108	0.0145974	0.000419719	781.808	36649.4	12192.9	4.10595	0.459956	15.4023	15.7765	0.449533
GOR132-G	6	70	15086.7	4.65797	3454.85	-91.6729	0.0562216	0.000876415	0.0123338	0.000451733	30879.3	7564.91	4620.87	4.08095	0.377522	9.21893	12.949	0.43387
GOR132-G	6	70	5893	4.65843	4339.37	-409.293	0.0587671	0.000872538	0.01288	0.000451522	3415.92	7639.66	3279.74	4.08135	0.394615	9.31758	13.5353	0.386786
GOR132-G	6	70	8188.55	4.6535	5936.78	-1476.99	0.0599122	0.000864185	0.0131316	0.000442409	19493.9	7610.72	10464.3	4.07703	0.402305	8.24947	13.799	0.467467
GOR132-G	6	70	2413.6	4.65713	-18726.4	4518.11	0.0543779	0.000798604	0.0119253	0.00042043	4147.19	34581.1	4864.85	4.08096	0.372002	9.2224	12.7597	0.353855
			B/Ca correction - average values					Dd11B			reported		regression model
				session 1	session 2	reported		session 1	session 2		B/Ca (umol/mol)		session 1				session 2
			BCR-2G	-5.15321	-3.85165	-3.83		-1.32321	-0.0216501		320.82		y ~ (b1*x^b2 + b3)				y ~ (b1*x^b2 + b3)
			GOR128-G	16.685	16.3706	13.55		3.13502	2.82058		1953.46
			GOR132-G	8.41689	9.0021	7.11		1.30689	1.8921		1055.83		Estimated Coefficients:				Estimated Coefficients:
													Estimate SE tStat pValue				Estimate SE tStat pValue
													_________ ___ _____ ______				_________ ___ _____ ______
													b1 -115.38 Inf 0 NaN				b1 -36.755 Inf 0 NaN							-115.38	-36.755
													b2 -0.024782 Inf 0 NaN				b2 -0.066646 Inf 0 NaN							-0.024782	-0.066646
													b3 98.618 Inf 0 NaN				b3 25.002 Inf 0 NaN							98.618	25.002
Treated as unknowns
Session 2																				reported [Ca] (ppm)	B/Ca (umol/mol)		d11B correction
StHs	6	0	651.293	4.60138	1984.51	2483.3	0.0333343	0.000916221	0.00750091	0.000455358	7111.77	2895.97	2808.08	4.03066	0.218325	-3.21669	7.48854	0.54469		37735.7	735.674		1.32845	-4.54514
StHs	6	0	2731.14	4.60135	2423.45	-934.087	0.033296	0.000886782	0.00748981	0.000446388	533.006	537.582	2040.84	4.03064	0.218074	-3.22352	7.47994	0.620203		37735.7	734.829		1.32664	-4.55016
StHs	6	0	1798.96	4.59998	2862.62	16943.1	0.0340473	0.000893904	0.00765784	0.000450616	303.782	1008.37	32511.7	4.02944	0.222995	-3.51912	7.64872	0.520083		37735.7	751.41		1.36182	-4.88094
StHs	6	0	1778.68	4.60238	1717.33	-1501.86	0.034373	0.000896649	0.00772446	0.000450705	222.41	226.773	2986.09	4.03154	0.225128	-2.99975	7.7219	0.696137		37735.7	758.599		1.37682	-4.37657
StHs	6	0	-6477.05	4.60223	1865.83	213206	0.0353875	0.000885537	0.00794582	0.000448992	20975.4	326.833	433240	4.03141	0.231772	-3.0329	7.9498	0.534565		37735.7	780.987		1.42257	-4.45547
StHs	6	0	2855.76	4.60366	2363.48	-312.014	0.0348634	0.00088545	0.00783426	0.000453473	1683.42	383.973	1713.09	4.03266	0.22834	-2.72213	7.83206	0.523765		37735.7	769.421		1.39911	-4.12125
BHVO-2G	6	0	547.512	4.60681	822.897	-41.745	0.0132477	0.000915892	0.00313565	0.000458635	54.2884	217.424	1188.25	4.03542	0.0867666	-2.03961	2.9761	1.31432		81474.7	135.414		-1.49822	-0.541383
BHVO-2G	6	0	626.227	4.60626	826.713	2661.27	0.0134302	0.000896003	0.00317625	0.000455036	152.632	192.486	5448.23	4.03564	0.0901827	-1.98595	3.09327	1.12811		81474.7	140.745		-1.43011	-0.555836
BHVO-2G	6	0	569.605	4.6041	627.638	54.438	0.0127646	0.0008551	0.00303137	0.000444493	106.776	112.354	330.563	4.03375	0.0857128	-2.45327	2.93995	1.26917		81474.7	133.77		-1.51981	-0.933458
BHVO-2G	6	0	520.188	4.60244	539.892	-171.108	0.0129031	0.000837466	0.00305307	0.000431501	51.3924	53.8823	1234.64	4.03229	0.086643	-2.81322	2.97186	1.33889		81474.7	135.221		-1.50074	-1.31248
Session 1
StHs	6	130	3781.08	4.59054	4823.89	-15572.5	0.0350129	0.000742209	0.00791084	0.000445257	2139.57	2980.56	31056.9	4.03245	0.220095	-2.77403	7.54925	0.606304		37735.7	741.637		0.668675	-3.44271
StHs	6	130	2962.98	4.5895	4447.68	-2936.65	0.0341489	0.000685445	0.00771186	0.000420461	782.301	2814.98	7317.86	4.03319	0.218553	-2.59233	7.49637	0.736237		37735.7	736.443		0.651611	-3.24395
StHs	6	130	3196.6	4.58422	3345.68	2058.55	0.0338563	0.000609705	0.00763143	0.000379011	1825.61	1408.23	4255.84	4.03211	0.233789	-2.85872	8.01895	0.407555		37735.7	787.782		0.815083	-3.67381
StHs	6	130	2458.99	4.58138	2574.48	-189.06	0.0286358	0.000504196	0.00647339	0.000332898	2039.19	565.118	1106.35	4.03274	0.217846	-2.703	7.47213	0.545298		37735.7	734.061		0.643748	-3.34675
StHs	6	130	-698.269	4.57615	1316.02	-229.535	0.0266485	0.000460618	0.00603683	0.000313995	5922.84	2376.73	531.66	4.02928	0.211326	-3.55778	7.24848	0.645181		37735.7	712.091		0.56994	-4.12772
BHVO-2G	6	130	517.388	4.58085	624.874	5983.46	0.0133522	0.000809521	0.00320137	0.000463259	70.6235	71.9474	11024.4	4.02325	0.0823949	-5.05023	2.82614	1.07952		81474.7	128.591		-3.67833	-1.3719
BHVO-2G	6	130	512.35	4.58252	651.811	-2218.41	0.0121022	0.000694577	0.00291346	0.000424013	57.4972	92.3106	4089.69	4.02831	0.07852	-3.79896	2.69324	1.30007		81474.7	122.544		-3.80052	0.00155789
BHVO-2G	6	130	474.301	4.57509	620.539	-649.6	0.0109426	0.000548828	0.00262689	0.000355047	80.9891	106.962	1074.19	4.02748	0.0800005	-4.0031	2.74402	1.42448		81474.7	124.854		-3.75312	-0.249985
BHVO-2G	6	130	513.338	4.56917	1077.88	-255.297	0.0107628	0.000524162	0.00258113	0.000340259	62.7805	736.968	589.093	4.02234	0.0806749	-5.27422	2.76715	1.85044		81474.7	125.907		-3.73183	-1.5424
BHVO-2G	6	130	523.489	4.57052	760.528	387.162	0.00991472	0.000440269	0.00238236	0.000309264	107.344	225.3	810.638	4.02563	0.0818791	-4.461	2.80845	1.67606		81474.7	127.786		-3.69425	-0.766748
																								mean	2SD	2SE
																							StHs	-4.0695	1.11685	0.336742
																							BHVO	-0.80807	1.0561	0.352034
